# Supplementary material for: Validated graft-specific biomarkers identify patients at risk for chronic graft-versus-host disease and death
Source: PubMed Central journal article supplement (PMC10378149; doi:10.1172/jci168575), 2023-08-01
Supplement: jci-133-168575-s066.pdf [file jci-133-168575-s066.pdf]

# ICMJE DISCLOSURE FORM

**Date:** 01032023

**Your Name:** Click or tap here to enter text. ALAN HOWARD

**Manuscript Title:** Discovery and Validation of Graft-specific Biomarkers for Risk of Chronic Graft-Versus-Host Disease and Mortality

**Manuscript Number (if known):** 168575-GCI-CMED-1

In the interest of transparency, we ask you to disclose all relationships/activities/interests listed below that are related to the content of your manuscript. "Related" means any relation with for-profit or not-for-profit third parties whose interests may be affected by the content of the manuscript. Disclosure represents a commitment to transparency and does not necessarily indicate a bias. If you are in doubt about whether to list a relationship/activity/interest, it is preferable that you do so.

The author's relationships/activities/interests should be defined broadly. For example, if your manuscript pertains to the epidemiology of hypertension, you should declare all relationships with manufacturers of antihypertensive medication, even if that medication is not mentioned in the manuscript.

In item #1 below, report all support for the work reported in this manuscript without time limit. For all other items, the time frame for disclosure is the past 36 months.

|                                                           | Name all entities with whom you have this relationship or indicate none (add rows as needed)                                                                                   | Specifications/Comments (e.g., if payments were made to you or to your institution)                                                                                                                                                                                                                                                                                                                      |
|-----------------------------------------------------------|--------------------------------------------------------------------------------------------------------------------------------------------------------------------------------|----------------------------------------------------------------------------------------------------------------------------------------------------------------------------------------------------------------------------------------------------------------------------------------------------------------------------------------------------------------------------------------------------------|
| <b>Time frame: Since the initial planning of the work</b> |                                                                                                                                                                                |                                                                                                                                                                                                                                                                                                                                                                                                          |
| <b>1</b>                                                  | All support for the present manuscript (e.g., funding, provision of study materials, medical writing, article processing charges, etc.)<br><b>No time limit for this item.</b> | <input checked="" type="checkbox"/> <b>None</b><br><div style="border: 1px solid black; height: 40px; margin-top: 5px;"></div> <div style="border: 1px solid black; height: 20px; margin-top: 5px;"></div> <div style="border: 1px solid black; height: 20px; margin-top: 5px;"></div> <div style="text-align: right; font-size: small; margin-top: 5px;">Click the tap key to add additional rows</div> |
| <b>Time frame: past 36 months</b>                         |                                                                                                                                                                                |                                                                                                                                                                                                                                                                                                                                                                                                          |
| <b>2</b>                                                  | Grants or contracts from any entity (if not indicated in item #1 above).                                                                                                       | <input checked="" type="checkbox"/> <b>None</b><br><div style="border: 1px solid black; height: 40px; margin-top: 5px;"></div> <div style="border: 1px solid black; height: 20px; margin-top: 5px;"></div> <div style="border: 1px solid black; height: 20px; margin-top: 5px;"></div>                                                                                                                   |
| <b>3</b>                                                  | Royalties or licenses                                                                                                                                                          | <input checked="" type="checkbox"/> <b>None</b><br><div style="border: 1px solid black; height: 40px; margin-top: 5px;"></div> <div style="border: 1px solid black; height: 20px; margin-top: 5px;"></div> <div style="border: 1px solid black; height: 20px; margin-top: 5px;"></div>                                                                                                                   |
| <b>4</b>                                                  | Consulting fees                                                                                                                                                                | <input checked="" type="checkbox"/> <b>None</b><br><div style="border: 1px solid black; height: 40px; margin-top: 5px;"></div> <div style="border: 1px solid black; height: 20px; margin-top: 5px;"></div> <div style="border: 1px solid black; height: 20px; margin-top: 5px;"></div>                                                                                                                   |

|    |                                                                                                              |                                                                                                                                                             |  |  |  |  |  |  |
|----|--------------------------------------------------------------------------------------------------------------|-------------------------------------------------------------------------------------------------------------------------------------------------------------|--|--|--|--|--|--|
|    |                                                                                                              |                                                                                                                                                             |  |  |  |  |  |  |
| 5  | Payment or honoraria for lectures, presentations, speakers bureaus, manuscript writing or educational events | <input checked="" type="checkbox"/> None<br><table border="1"> <tr><td></td><td></td></tr> <tr><td></td><td></td></tr> <tr><td></td><td></td></tr> </table> |  |  |  |  |  |  |
|    |                                                                                                              |                                                                                                                                                             |  |  |  |  |  |  |
|    |                                                                                                              |                                                                                                                                                             |  |  |  |  |  |  |
|    |                                                                                                              |                                                                                                                                                             |  |  |  |  |  |  |
| 6  | Payment for expert testimony                                                                                 | <input checked="" type="checkbox"/> None<br><table border="1"> <tr><td></td><td></td></tr> <tr><td></td><td></td></tr> <tr><td></td><td></td></tr> </table> |  |  |  |  |  |  |
|    |                                                                                                              |                                                                                                                                                             |  |  |  |  |  |  |
|    |                                                                                                              |                                                                                                                                                             |  |  |  |  |  |  |
|    |                                                                                                              |                                                                                                                                                             |  |  |  |  |  |  |
| 7  | Support for attending meetings and/or travel                                                                 | <input checked="" type="checkbox"/> None<br><table border="1"> <tr><td></td><td></td></tr> <tr><td></td><td></td></tr> <tr><td></td><td></td></tr> </table> |  |  |  |  |  |  |
|    |                                                                                                              |                                                                                                                                                             |  |  |  |  |  |  |
|    |                                                                                                              |                                                                                                                                                             |  |  |  |  |  |  |
|    |                                                                                                              |                                                                                                                                                             |  |  |  |  |  |  |
| 8  | Patents planned, issued or pending                                                                           | <input checked="" type="checkbox"/> None<br><table border="1"> <tr><td></td><td></td></tr> <tr><td></td><td></td></tr> <tr><td></td><td></td></tr> </table> |  |  |  |  |  |  |
|    |                                                                                                              |                                                                                                                                                             |  |  |  |  |  |  |
|    |                                                                                                              |                                                                                                                                                             |  |  |  |  |  |  |
|    |                                                                                                              |                                                                                                                                                             |  |  |  |  |  |  |
| 9  | Participation on a Data Safety Monitoring Board or Advisory Board                                            | <input checked="" type="checkbox"/> None<br><table border="1"> <tr><td></td><td></td></tr> <tr><td></td><td></td></tr> <tr><td></td><td></td></tr> </table> |  |  |  |  |  |  |
|    |                                                                                                              |                                                                                                                                                             |  |  |  |  |  |  |
|    |                                                                                                              |                                                                                                                                                             |  |  |  |  |  |  |
|    |                                                                                                              |                                                                                                                                                             |  |  |  |  |  |  |
| 10 | Leadership or fiduciary role in other board, society, committee or advocacy group, paid or unpaid            | <input checked="" type="checkbox"/> None<br><table border="1"> <tr><td></td><td></td></tr> <tr><td></td><td></td></tr> <tr><td></td><td></td></tr> </table> |  |  |  |  |  |  |
|    |                                                                                                              |                                                                                                                                                             |  |  |  |  |  |  |
|    |                                                                                                              |                                                                                                                                                             |  |  |  |  |  |  |
|    |                                                                                                              |                                                                                                                                                             |  |  |  |  |  |  |
| 11 | Stock or stock options                                                                                       | <input checked="" type="checkbox"/> None<br><table border="1"> <tr><td></td><td></td></tr> <tr><td></td><td></td></tr> <tr><td></td><td></td></tr> </table> |  |  |  |  |  |  |
|    |                                                                                                              |                                                                                                                                                             |  |  |  |  |  |  |
|    |                                                                                                              |                                                                                                                                                             |  |  |  |  |  |  |
|    |                                                                                                              |                                                                                                                                                             |  |  |  |  |  |  |

|    |                                                                                  |                                                                                                                                                                                          |  |  |  |  |  |  |
|----|----------------------------------------------------------------------------------|------------------------------------------------------------------------------------------------------------------------------------------------------------------------------------------|--|--|--|--|--|--|
| 12 | Receipt of equipment, materials, drugs, medical writing, gifts or other services | <input checked="" type="checkbox"/> None                                                                                                                                                 |  |  |  |  |  |  |
| 13 | Other financial or non-financial interests                                       | <input checked="" type="checkbox"/> None<br><table border="1" data-bbox="370 373 1503 478"> <tr><td></td><td></td></tr> <tr><td></td><td></td></tr> <tr><td></td><td></td></tr> </table> |  |  |  |  |  |  |
|    |                                                                                  |                                                                                                                                                                                          |  |  |  |  |  |  |
|    |                                                                                  |                                                                                                                                                                                          |  |  |  |  |  |  |
|    |                                                                                  |                                                                                                                                                                                          |  |  |  |  |  |  |

Please place an "X" next to the following statement to indicate your agreement:

I certify that I have answered every question and have not altered the wording of any of the questions on this form.

## ICMJE DISCLOSURE FORM

**Date:** 01032023

**Your Name:** Bruce Blazar

**Manuscript Title:** Discovery and Validation of Graft-specific Biomarkers for Risk of Chronic Graft-Versus-Host Disease and Mortality

**Manuscript Number (if known):** 168575-JCI-CMED-1

In the interest of transparency, we ask you to disclose all relationships/activities/interests listed below that are related to the content of your manuscript. "Related" means any relation with for-profit or not-for-profit third parties whose interests may be affected by the content of the manuscript. Disclosure represents a commitment to transparency and does not necessarily indicate a bias. If you are in doubt about whether to list a relationship/activity/interest, it is preferable that you do so.

The author's relationships/activities/interests should be defined broadly. For example, if your manuscript pertains to the epidemiology of hypertension, you should declare all relationships with manufacturers of antihypertensive medication, even if that medication is not mentioned in the manuscript.

In item #1 below, report all support for the work reported in this manuscript without time limit. For all other items, the time frame for disclosure is the past 36 months.

|                                                    |                                                                                                                                                                                | Name all entities with whom you have this relationship or indicate none (add rows as needed)                                                                                                                                                                                                                                                                                                | Specifications/Comments (e.g., if payments were made to you or to your institution) |  |                         |  |                                           |  |  |
|----------------------------------------------------|--------------------------------------------------------------------------------------------------------------------------------------------------------------------------------|---------------------------------------------------------------------------------------------------------------------------------------------------------------------------------------------------------------------------------------------------------------------------------------------------------------------------------------------------------------------------------------------|-------------------------------------------------------------------------------------|--|-------------------------|--|-------------------------------------------|--|--|
| Time frame: Since the initial planning of the work |                                                                                                                                                                                |                                                                                                                                                                                                                                                                                                                                                                                             |                                                                                     |  |                         |  |                                           |  |  |
| <b>1</b>                                           | All support for the present manuscript (e.g., funding, provision of study materials, medical writing, article processing charges, etc.)<br><b>No time limit for this item.</b> | <input type="checkbox"/> None<br><br><table border="1" style="width: 100%; border-collapse: collapse;"> <tr> <td style="width: 50%;"><b>NIH P01 AI056299</b></td> <td style="width: 50%;"></td> </tr> <tr> <td><b>NIH P01 HL158505</b></td> <td></td> </tr> <tr> <td colspan="2" style="text-align: right; font-size: small;">Click the tab key to add additional rows.</td> </tr> </table> | <b>NIH P01 AI056299</b>                                                             |  | <b>NIH P01 HL158505</b> |  | Click the tab key to add additional rows. |  |  |
| <b>NIH P01 AI056299</b>                            |                                                                                                                                                                                |                                                                                                                                                                                                                                                                                                                                                                                             |                                                                                     |  |                         |  |                                           |  |  |
| <b>NIH P01 HL158505</b>                            |                                                                                                                                                                                |                                                                                                                                                                                                                                                                                                                                                                                             |                                                                                     |  |                         |  |                                           |  |  |
| Click the tab key to add additional rows.          |                                                                                                                                                                                |                                                                                                                                                                                                                                                                                                                                                                                             |                                                                                     |  |                         |  |                                           |  |  |
| Time frame: past 36 months                         |                                                                                                                                                                                |                                                                                                                                                                                                                                                                                                                                                                                             |                                                                                     |  |                         |  |                                           |  |  |
| <b>2</b>                                           | Grants or contracts from any entity (if not indicated in item #1 above).                                                                                                       | <input checked="" type="checkbox"/> None<br><br><table border="1" style="width: 100%; border-collapse: collapse;"> <tr><td style="width: 50%;"></td><td style="width: 50%;"></td></tr> <tr><td></td><td></td></tr> <tr><td></td><td></td></tr> </table>                                                                                                                                     |                                                                                     |  |                         |  |                                           |  |  |
|                                                    |                                                                                                                                                                                |                                                                                                                                                                                                                                                                                                                                                                                             |                                                                                     |  |                         |  |                                           |  |  |
|                                                    |                                                                                                                                                                                |                                                                                                                                                                                                                                                                                                                                                                                             |                                                                                     |  |                         |  |                                           |  |  |
|                                                    |                                                                                                                                                                                |                                                                                                                                                                                                                                                                                                                                                                                             |                                                                                     |  |                         |  |                                           |  |  |
| <b>3</b>                                           | Royalties or licenses                                                                                                                                                          | <input checked="" type="checkbox"/> None<br><br><table border="1" style="width: 100%; border-collapse: collapse;"> <tr><td style="width: 50%;"></td><td style="width: 50%;"></td></tr> <tr><td></td><td></td></tr> <tr><td></td><td></td></tr> </table>                                                                                                                                     |                                                                                     |  |                         |  |                                           |  |  |
|                                                    |                                                                                                                                                                                |                                                                                                                                                                                                                                                                                                                                                                                             |                                                                                     |  |                         |  |                                           |  |  |
|                                                    |                                                                                                                                                                                |                                                                                                                                                                                                                                                                                                                                                                                             |                                                                                     |  |                         |  |                                           |  |  |
|                                                    |                                                                                                                                                                                |                                                                                                                                                                                                                                                                                                                                                                                             |                                                                                     |  |                         |  |                                           |  |  |

|    |                                                                                                              | Name all entities with whom you have this relationship or indicate none (add rows as needed)                                                                                                                                                                                                                                                                           | Specifications/Comments (e.g., if payments were made to you or to your institution) |  |  |  |  |  |  |  |  |
|----|--------------------------------------------------------------------------------------------------------------|------------------------------------------------------------------------------------------------------------------------------------------------------------------------------------------------------------------------------------------------------------------------------------------------------------------------------------------------------------------------|-------------------------------------------------------------------------------------|--|--|--|--|--|--|--|--|
| 4  | Consulting fees                                                                                              | <input checked="" type="checkbox"/> <b>None</b><br><table border="1" style="width: 100%; border-collapse: collapse;"> <tr><td style="width: 50%; height: 15px;"></td><td style="width: 50%;"></td></tr> <tr><td style="height: 15px;"></td><td></td></tr> <tr><td style="height: 15px;"></td><td></td></tr> <tr><td style="height: 15px;"></td><td></td></tr> </table> |                                                                                     |  |  |  |  |  |  |  |  |
|    |                                                                                                              |                                                                                                                                                                                                                                                                                                                                                                        |                                                                                     |  |  |  |  |  |  |  |  |
|    |                                                                                                              |                                                                                                                                                                                                                                                                                                                                                                        |                                                                                     |  |  |  |  |  |  |  |  |
|    |                                                                                                              |                                                                                                                                                                                                                                                                                                                                                                        |                                                                                     |  |  |  |  |  |  |  |  |
|    |                                                                                                              |                                                                                                                                                                                                                                                                                                                                                                        |                                                                                     |  |  |  |  |  |  |  |  |
| 5  | Payment or honoraria for lectures, presentations, speakers bureaus, manuscript writing or educational events | <input checked="" type="checkbox"/> <b>None</b><br><table border="1" style="width: 100%; border-collapse: collapse;"> <tr><td style="width: 50%; height: 15px;"></td><td style="width: 50%;"></td></tr> <tr><td style="height: 15px;"></td><td></td></tr> <tr><td style="height: 15px;"></td><td></td></tr> </table>                                                   |                                                                                     |  |  |  |  |  |  |  |  |
|    |                                                                                                              |                                                                                                                                                                                                                                                                                                                                                                        |                                                                                     |  |  |  |  |  |  |  |  |
|    |                                                                                                              |                                                                                                                                                                                                                                                                                                                                                                        |                                                                                     |  |  |  |  |  |  |  |  |
|    |                                                                                                              |                                                                                                                                                                                                                                                                                                                                                                        |                                                                                     |  |  |  |  |  |  |  |  |
| 6  | Payment for expert testimony                                                                                 | <input checked="" type="checkbox"/> <b>None</b><br><table border="1" style="width: 100%; border-collapse: collapse;"> <tr><td style="width: 50%; height: 15px;"></td><td style="width: 50%;"></td></tr> <tr><td style="height: 15px;"></td><td></td></tr> <tr><td style="height: 15px;"></td><td></td></tr> </table>                                                   |                                                                                     |  |  |  |  |  |  |  |  |
|    |                                                                                                              |                                                                                                                                                                                                                                                                                                                                                                        |                                                                                     |  |  |  |  |  |  |  |  |
|    |                                                                                                              |                                                                                                                                                                                                                                                                                                                                                                        |                                                                                     |  |  |  |  |  |  |  |  |
|    |                                                                                                              |                                                                                                                                                                                                                                                                                                                                                                        |                                                                                     |  |  |  |  |  |  |  |  |
| 7  | Support for attending meetings and/or travel                                                                 | <input checked="" type="checkbox"/> <b>None</b><br><table border="1" style="width: 100%; border-collapse: collapse;"> <tr><td style="width: 50%; height: 15px;"></td><td style="width: 50%;"></td></tr> <tr><td style="height: 15px;"></td><td></td></tr> <tr><td style="height: 15px;"></td><td></td></tr> </table>                                                   |                                                                                     |  |  |  |  |  |  |  |  |
|    |                                                                                                              |                                                                                                                                                                                                                                                                                                                                                                        |                                                                                     |  |  |  |  |  |  |  |  |
|    |                                                                                                              |                                                                                                                                                                                                                                                                                                                                                                        |                                                                                     |  |  |  |  |  |  |  |  |
|    |                                                                                                              |                                                                                                                                                                                                                                                                                                                                                                        |                                                                                     |  |  |  |  |  |  |  |  |
| 8  | Patents planned, issued or pending                                                                           | <input checked="" type="checkbox"/> <b>None</b><br><table border="1" style="width: 100%; border-collapse: collapse;"> <tr><td style="width: 50%; height: 15px;"></td><td style="width: 50%;"></td></tr> <tr><td style="height: 15px;"></td><td></td></tr> <tr><td style="height: 15px;"></td><td></td></tr> </table>                                                   |                                                                                     |  |  |  |  |  |  |  |  |
|    |                                                                                                              |                                                                                                                                                                                                                                                                                                                                                                        |                                                                                     |  |  |  |  |  |  |  |  |
|    |                                                                                                              |                                                                                                                                                                                                                                                                                                                                                                        |                                                                                     |  |  |  |  |  |  |  |  |
|    |                                                                                                              |                                                                                                                                                                                                                                                                                                                                                                        |                                                                                     |  |  |  |  |  |  |  |  |
| 9  | Participation on a Data Safety Monitoring Board or Advisory Board                                            | <input checked="" type="checkbox"/> <b>None</b><br><table border="1" style="width: 100%; border-collapse: collapse;"> <tr><td style="width: 50%; height: 15px;"></td><td style="width: 50%;"></td></tr> <tr><td style="height: 15px;"></td><td></td></tr> <tr><td style="height: 15px;"></td><td></td></tr> </table>                                                   |                                                                                     |  |  |  |  |  |  |  |  |
|    |                                                                                                              |                                                                                                                                                                                                                                                                                                                                                                        |                                                                                     |  |  |  |  |  |  |  |  |
|    |                                                                                                              |                                                                                                                                                                                                                                                                                                                                                                        |                                                                                     |  |  |  |  |  |  |  |  |
|    |                                                                                                              |                                                                                                                                                                                                                                                                                                                                                                        |                                                                                     |  |  |  |  |  |  |  |  |
| 10 | Leadership or fiduciary role in other board, society, committee or advocacy group, paid or unpaid            | <input checked="" type="checkbox"/> <b>None</b><br><table border="1" style="width: 100%; border-collapse: collapse;"> <tr><td style="width: 50%; height: 15px;"></td><td style="width: 50%;"></td></tr> <tr><td style="height: 15px;"></td><td></td></tr> <tr><td style="height: 15px;"></td><td></td></tr> </table>                                                   |                                                                                     |  |  |  |  |  |  |  |  |
|    |                                                                                                              |                                                                                                                                                                                                                                                                                                                                                                        |                                                                                     |  |  |  |  |  |  |  |  |
|    |                                                                                                              |                                                                                                                                                                                                                                                                                                                                                                        |                                                                                     |  |  |  |  |  |  |  |  |
|    |                                                                                                              |                                                                                                                                                                                                                                                                                                                                                                        |                                                                                     |  |  |  |  |  |  |  |  |

|           |                                                                                  | Name all entities with whom you have this relationship or indicate none (add rows as needed)                                                                                                                                                                                                                         | Specifications/Comments (e.g., if payments were made to you or to your institution) |  |  |  |  |  |  |
|-----------|----------------------------------------------------------------------------------|----------------------------------------------------------------------------------------------------------------------------------------------------------------------------------------------------------------------------------------------------------------------------------------------------------------------|-------------------------------------------------------------------------------------|--|--|--|--|--|--|
| <b>11</b> | Stock or stock options                                                           | <input checked="" type="checkbox"/> <b>None</b><br><table border="1" style="width: 100%; border-collapse: collapse;"> <tr><td style="width: 50%; height: 15px;"></td><td style="width: 50%;"></td></tr> <tr><td style="height: 15px;"></td><td></td></tr> <tr><td style="height: 15px;"></td><td></td></tr> </table> |                                                                                     |  |  |  |  |  |  |
|           |                                                                                  |                                                                                                                                                                                                                                                                                                                      |                                                                                     |  |  |  |  |  |  |
|           |                                                                                  |                                                                                                                                                                                                                                                                                                                      |                                                                                     |  |  |  |  |  |  |
|           |                                                                                  |                                                                                                                                                                                                                                                                                                                      |                                                                                     |  |  |  |  |  |  |
| <b>12</b> | Receipt of equipment, materials, drugs, medical writing, gifts or other services | <input checked="" type="checkbox"/> <b>None</b><br><table border="1" style="width: 100%; border-collapse: collapse;"> <tr><td style="width: 50%; height: 15px;"></td><td style="width: 50%;"></td></tr> <tr><td style="height: 15px;"></td><td></td></tr> <tr><td style="height: 15px;"></td><td></td></tr> </table> |                                                                                     |  |  |  |  |  |  |
|           |                                                                                  |                                                                                                                                                                                                                                                                                                                      |                                                                                     |  |  |  |  |  |  |
|           |                                                                                  |                                                                                                                                                                                                                                                                                                                      |                                                                                     |  |  |  |  |  |  |
|           |                                                                                  |                                                                                                                                                                                                                                                                                                                      |                                                                                     |  |  |  |  |  |  |
| <b>13</b> | Other financial or non-financial interests                                       | <input checked="" type="checkbox"/> <b>None</b><br><table border="1" style="width: 100%; border-collapse: collapse;"> <tr><td style="width: 50%; height: 15px;"></td><td style="width: 50%;"></td></tr> <tr><td style="height: 15px;"></td><td></td></tr> <tr><td style="height: 15px;"></td><td></td></tr> </table> |                                                                                     |  |  |  |  |  |  |
|           |                                                                                  |                                                                                                                                                                                                                                                                                                                      |                                                                                     |  |  |  |  |  |  |
|           |                                                                                  |                                                                                                                                                                                                                                                                                                                      |                                                                                     |  |  |  |  |  |  |
|           |                                                                                  |                                                                                                                                                                                                                                                                                                                      |                                                                                     |  |  |  |  |  |  |

**Please place an "X" next to the following statement to indicate your agreement:**

I certify that I have answered every question and have not altered the wording of any of the questions on this form.

## ICMJE DISCLOSURE FORM

**Date:** 01032023

**Your Name:** Denggang Fu

**Manuscript Title:** Discovery and Validation of Graft-specific Biomarkers for Risk of Chronic Graft-Versus-Host Disease and Mortality

**Manuscript Number (if known):** 168575-JCI-CMED-1

In the interest of transparency, we ask you to disclose all relationships/activities/interests listed below that are related to the content of your manuscript. "Related" means any relation with for-profit or not-for-profit third parties whose interests may be affected by the content of the manuscript. Disclosure represents a commitment to transparency and does not necessarily indicate a bias. If you are in doubt about whether to list a relationship/activity/interest, it is preferable that you do so.

The author's relationships/activities/interests should be defined broadly. For example, if your manuscript pertains to the epidemiology of hypertension, you should declare all relationships with manufacturers of antihypertensive medication, even if that medication is not mentioned in the manuscript.

In item #1 below, report all support for the work reported in this manuscript without time limit. For all other items, the time frame for disclosure is the past 36 months.

|                                                    | Name all entities with whom you have this relationship or indicate none (add rows as needed)                                                                                   | Specifications/Comments (e.g., if payments were made to you or to your institution)                                                                                                                                                                                                                                                                 |  |  |  |  |  |  |
|----------------------------------------------------|--------------------------------------------------------------------------------------------------------------------------------------------------------------------------------|-----------------------------------------------------------------------------------------------------------------------------------------------------------------------------------------------------------------------------------------------------------------------------------------------------------------------------------------------------|--|--|--|--|--|--|
| Time frame: Since the initial planning of the work |                                                                                                                                                                                |                                                                                                                                                                                                                                                                                                                                                     |  |  |  |  |  |  |
| <b>1</b>                                           | All support for the present manuscript (e.g., funding, provision of study materials, medical writing, article processing charges, etc.)<br><b>No time limit for this item.</b> | <input checked="" type="checkbox"/> <b>None</b><br><table border="1" style="width: 100%; height: 40px; margin-top: 5px;"> <tr><td style="width: 60%;"></td><td></td></tr> <tr><td></td><td></td></tr> <tr><td></td><td></td></tr> </table> <p style="font-size: small; color: gray; margin-top: 5px;">Click the tab key to add additional rows.</p> |  |  |  |  |  |  |
|                                                    |                                                                                                                                                                                |                                                                                                                                                                                                                                                                                                                                                     |  |  |  |  |  |  |
|                                                    |                                                                                                                                                                                |                                                                                                                                                                                                                                                                                                                                                     |  |  |  |  |  |  |
|                                                    |                                                                                                                                                                                |                                                                                                                                                                                                                                                                                                                                                     |  |  |  |  |  |  |
| Time frame: past 36 months                         |                                                                                                                                                                                |                                                                                                                                                                                                                                                                                                                                                     |  |  |  |  |  |  |
| <b>2</b>                                           | Grants or contracts from any entity (if not indicated in item #1 above).                                                                                                       | <input checked="" type="checkbox"/> <b>None</b><br><table border="1" style="width: 100%; height: 40px; margin-top: 5px;"> <tr><td style="width: 60%;"></td><td></td></tr> <tr><td></td><td></td></tr> <tr><td></td><td></td></tr> </table>                                                                                                          |  |  |  |  |  |  |
|                                                    |                                                                                                                                                                                |                                                                                                                                                                                                                                                                                                                                                     |  |  |  |  |  |  |
|                                                    |                                                                                                                                                                                |                                                                                                                                                                                                                                                                                                                                                     |  |  |  |  |  |  |
|                                                    |                                                                                                                                                                                |                                                                                                                                                                                                                                                                                                                                                     |  |  |  |  |  |  |
| <b>3</b>                                           | Royalties or licenses                                                                                                                                                          | <input checked="" type="checkbox"/> <b>None</b><br><table border="1" style="width: 100%; height: 40px; margin-top: 5px;"> <tr><td style="width: 60%;"></td><td></td></tr> <tr><td></td><td></td></tr> <tr><td></td><td></td></tr> </table>                                                                                                          |  |  |  |  |  |  |
|                                                    |                                                                                                                                                                                |                                                                                                                                                                                                                                                                                                                                                     |  |  |  |  |  |  |
|                                                    |                                                                                                                                                                                |                                                                                                                                                                                                                                                                                                                                                     |  |  |  |  |  |  |
|                                                    |                                                                                                                                                                                |                                                                                                                                                                                                                                                                                                                                                     |  |  |  |  |  |  |

|    |                                                                                                              | Name all entities with whom you have this relationship or indicate none (add rows as needed)                                                                                                                                                                                                                                                                           | Specifications/Comments (e.g., if payments were made to you or to your institution) |  |  |  |  |  |  |  |  |
|----|--------------------------------------------------------------------------------------------------------------|------------------------------------------------------------------------------------------------------------------------------------------------------------------------------------------------------------------------------------------------------------------------------------------------------------------------------------------------------------------------|-------------------------------------------------------------------------------------|--|--|--|--|--|--|--|--|
| 4  | Consulting fees                                                                                              | <input checked="" type="checkbox"/> <b>None</b><br><table border="1" style="width: 100%; border-collapse: collapse;"> <tr><td style="width: 50%; height: 15px;"></td><td style="width: 50%;"></td></tr> <tr><td style="height: 15px;"></td><td></td></tr> <tr><td style="height: 15px;"></td><td></td></tr> <tr><td style="height: 15px;"></td><td></td></tr> </table> |                                                                                     |  |  |  |  |  |  |  |  |
|    |                                                                                                              |                                                                                                                                                                                                                                                                                                                                                                        |                                                                                     |  |  |  |  |  |  |  |  |
|    |                                                                                                              |                                                                                                                                                                                                                                                                                                                                                                        |                                                                                     |  |  |  |  |  |  |  |  |
|    |                                                                                                              |                                                                                                                                                                                                                                                                                                                                                                        |                                                                                     |  |  |  |  |  |  |  |  |
|    |                                                                                                              |                                                                                                                                                                                                                                                                                                                                                                        |                                                                                     |  |  |  |  |  |  |  |  |
| 5  | Payment or honoraria for lectures, presentations, speakers bureaus, manuscript writing or educational events | <input checked="" type="checkbox"/> <b>None</b><br><table border="1" style="width: 100%; border-collapse: collapse;"> <tr><td style="width: 50%; height: 15px;"></td><td style="width: 50%;"></td></tr> <tr><td style="height: 15px;"></td><td></td></tr> <tr><td style="height: 15px;"></td><td></td></tr> </table>                                                   |                                                                                     |  |  |  |  |  |  |  |  |
|    |                                                                                                              |                                                                                                                                                                                                                                                                                                                                                                        |                                                                                     |  |  |  |  |  |  |  |  |
|    |                                                                                                              |                                                                                                                                                                                                                                                                                                                                                                        |                                                                                     |  |  |  |  |  |  |  |  |
|    |                                                                                                              |                                                                                                                                                                                                                                                                                                                                                                        |                                                                                     |  |  |  |  |  |  |  |  |
| 6  | Payment for expert testimony                                                                                 | <input checked="" type="checkbox"/> <b>None</b><br><table border="1" style="width: 100%; border-collapse: collapse;"> <tr><td style="width: 50%; height: 15px;"></td><td style="width: 50%;"></td></tr> <tr><td style="height: 15px;"></td><td></td></tr> <tr><td style="height: 15px;"></td><td></td></tr> </table>                                                   |                                                                                     |  |  |  |  |  |  |  |  |
|    |                                                                                                              |                                                                                                                                                                                                                                                                                                                                                                        |                                                                                     |  |  |  |  |  |  |  |  |
|    |                                                                                                              |                                                                                                                                                                                                                                                                                                                                                                        |                                                                                     |  |  |  |  |  |  |  |  |
|    |                                                                                                              |                                                                                                                                                                                                                                                                                                                                                                        |                                                                                     |  |  |  |  |  |  |  |  |
| 7  | Support for attending meetings and/or travel                                                                 | <input checked="" type="checkbox"/> <b>None</b><br><table border="1" style="width: 100%; border-collapse: collapse;"> <tr><td style="width: 50%; height: 15px;"></td><td style="width: 50%;"></td></tr> <tr><td style="height: 15px;"></td><td></td></tr> <tr><td style="height: 15px;"></td><td></td></tr> </table>                                                   |                                                                                     |  |  |  |  |  |  |  |  |
|    |                                                                                                              |                                                                                                                                                                                                                                                                                                                                                                        |                                                                                     |  |  |  |  |  |  |  |  |
|    |                                                                                                              |                                                                                                                                                                                                                                                                                                                                                                        |                                                                                     |  |  |  |  |  |  |  |  |
|    |                                                                                                              |                                                                                                                                                                                                                                                                                                                                                                        |                                                                                     |  |  |  |  |  |  |  |  |
| 8  | Patents planned, issued or pending                                                                           | <input checked="" type="checkbox"/> <b>None</b><br><table border="1" style="width: 100%; border-collapse: collapse;"> <tr><td style="width: 50%; height: 15px;"></td><td style="width: 50%;"></td></tr> <tr><td style="height: 15px;"></td><td></td></tr> <tr><td style="height: 15px;"></td><td></td></tr> </table>                                                   |                                                                                     |  |  |  |  |  |  |  |  |
|    |                                                                                                              |                                                                                                                                                                                                                                                                                                                                                                        |                                                                                     |  |  |  |  |  |  |  |  |
|    |                                                                                                              |                                                                                                                                                                                                                                                                                                                                                                        |                                                                                     |  |  |  |  |  |  |  |  |
|    |                                                                                                              |                                                                                                                                                                                                                                                                                                                                                                        |                                                                                     |  |  |  |  |  |  |  |  |
| 9  | Participation on a Data Safety Monitoring Board or Advisory Board                                            | <input checked="" type="checkbox"/> <b>None</b><br><table border="1" style="width: 100%; border-collapse: collapse;"> <tr><td style="width: 50%; height: 15px;"></td><td style="width: 50%;"></td></tr> <tr><td style="height: 15px;"></td><td></td></tr> <tr><td style="height: 15px;"></td><td></td></tr> </table>                                                   |                                                                                     |  |  |  |  |  |  |  |  |
|    |                                                                                                              |                                                                                                                                                                                                                                                                                                                                                                        |                                                                                     |  |  |  |  |  |  |  |  |
|    |                                                                                                              |                                                                                                                                                                                                                                                                                                                                                                        |                                                                                     |  |  |  |  |  |  |  |  |
|    |                                                                                                              |                                                                                                                                                                                                                                                                                                                                                                        |                                                                                     |  |  |  |  |  |  |  |  |
| 10 | Leadership or fiduciary role in other board, society, committee or advocacy group, paid or unpaid            | <input checked="" type="checkbox"/> <b>None</b><br><table border="1" style="width: 100%; border-collapse: collapse;"> <tr><td style="width: 50%; height: 15px;"></td><td style="width: 50%;"></td></tr> <tr><td style="height: 15px;"></td><td></td></tr> <tr><td style="height: 15px;"></td><td></td></tr> </table>                                                   |                                                                                     |  |  |  |  |  |  |  |  |
|    |                                                                                                              |                                                                                                                                                                                                                                                                                                                                                                        |                                                                                     |  |  |  |  |  |  |  |  |
|    |                                                                                                              |                                                                                                                                                                                                                                                                                                                                                                        |                                                                                     |  |  |  |  |  |  |  |  |
|    |                                                                                                              |                                                                                                                                                                                                                                                                                                                                                                        |                                                                                     |  |  |  |  |  |  |  |  |

|           |                                                                                  | Name all entities with whom you have this relationship or indicate none (add rows as needed)                                                                                                                                                                                                                         | Specifications/Comments (e.g., if payments were made to you or to your institution) |  |  |  |  |  |  |
|-----------|----------------------------------------------------------------------------------|----------------------------------------------------------------------------------------------------------------------------------------------------------------------------------------------------------------------------------------------------------------------------------------------------------------------|-------------------------------------------------------------------------------------|--|--|--|--|--|--|
| <b>11</b> | Stock or stock options                                                           | <input checked="" type="checkbox"/> <b>None</b><br><table border="1" style="width: 100%; border-collapse: collapse;"> <tr><td style="width: 50%; height: 15px;"></td><td style="width: 50%;"></td></tr> <tr><td style="height: 15px;"></td><td></td></tr> <tr><td style="height: 15px;"></td><td></td></tr> </table> |                                                                                     |  |  |  |  |  |  |
|           |                                                                                  |                                                                                                                                                                                                                                                                                                                      |                                                                                     |  |  |  |  |  |  |
|           |                                                                                  |                                                                                                                                                                                                                                                                                                                      |                                                                                     |  |  |  |  |  |  |
|           |                                                                                  |                                                                                                                                                                                                                                                                                                                      |                                                                                     |  |  |  |  |  |  |
| <b>12</b> | Receipt of equipment, materials, drugs, medical writing, gifts or other services | <input checked="" type="checkbox"/> <b>None</b><br><table border="1" style="width: 100%; border-collapse: collapse;"> <tr><td style="width: 50%; height: 15px;"></td><td style="width: 50%;"></td></tr> <tr><td style="height: 15px;"></td><td></td></tr> <tr><td style="height: 15px;"></td><td></td></tr> </table> |                                                                                     |  |  |  |  |  |  |
|           |                                                                                  |                                                                                                                                                                                                                                                                                                                      |                                                                                     |  |  |  |  |  |  |
|           |                                                                                  |                                                                                                                                                                                                                                                                                                                      |                                                                                     |  |  |  |  |  |  |
|           |                                                                                  |                                                                                                                                                                                                                                                                                                                      |                                                                                     |  |  |  |  |  |  |
| <b>13</b> | Other financial or non-financial interests                                       | <input checked="" type="checkbox"/> <b>None</b><br><table border="1" style="width: 100%; border-collapse: collapse;"> <tr><td style="width: 50%; height: 15px;"></td><td style="width: 50%;"></td></tr> <tr><td style="height: 15px;"></td><td></td></tr> <tr><td style="height: 15px;"></td><td></td></tr> </table> |                                                                                     |  |  |  |  |  |  |
|           |                                                                                  |                                                                                                                                                                                                                                                                                                                      |                                                                                     |  |  |  |  |  |  |
|           |                                                                                  |                                                                                                                                                                                                                                                                                                                      |                                                                                     |  |  |  |  |  |  |
|           |                                                                                  |                                                                                                                                                                                                                                                                                                                      |                                                                                     |  |  |  |  |  |  |

**Please place an "X" next to the following statement to indicate your agreement:**

I certify that I have answered every question and have not altered the wording of any of the questions on this form.

## ICMJE DISCLOSURE FORM

**Date:** 01032023

**Your Name:** Fathima A. Mohamed

**Manuscript Title:** Discovery and Validation of Graft-specific Biomarkers for Risk of Chronic Graft-Versus-Host Disease and Mortality

**Manuscript Number (if known):** 168575-JCI-CMED-1

In the interest of transparency, we ask you to disclose all relationships/activities/interests listed below that are related to the content of your manuscript. "Related" means any relation with for-profit or not-for-profit third parties whose interests may be affected by the content of the manuscript. Disclosure represents a commitment to transparency and does not necessarily indicate a bias. If you are in doubt about whether to list a relationship/activity/interest, it is preferable that you do so.

The author's relationships/activities/interests should be defined broadly. For example, if your manuscript pertains to the epidemiology of hypertension, you should declare all relationships with manufacturers of antihypertensive medication, even if that medication is not mentioned in the manuscript.

In item #1 below, report all support for the work reported in this manuscript without time limit. For all other items, the time frame for disclosure is the past 36 months.

|                                                    | Name all entities with whom you have this relationship or indicate none (add rows as needed)                                                                                   | Specifications/Comments (e.g., if payments were made to you or to your institution)                                                                                                                                                                                                                                                                                       |  |  |  |  |  |  |
|----------------------------------------------------|--------------------------------------------------------------------------------------------------------------------------------------------------------------------------------|---------------------------------------------------------------------------------------------------------------------------------------------------------------------------------------------------------------------------------------------------------------------------------------------------------------------------------------------------------------------------|--|--|--|--|--|--|
| Time frame: Since the initial planning of the work |                                                                                                                                                                                |                                                                                                                                                                                                                                                                                                                                                                           |  |  |  |  |  |  |
| <b>1</b>                                           | All support for the present manuscript (e.g., funding, provision of study materials, medical writing, article processing charges, etc.)<br><b>No time limit for this item.</b> | <input checked="" type="checkbox"/> <b>None</b><br><table border="1" style="width: 100%; height: 40px; margin-top: 5px;"> <tr><td style="width: 60%;"></td><td style="width: 40%;"></td></tr> <tr><td></td><td></td></tr> <tr><td></td><td></td></tr> </table> <p style="font-size: small; color: gray; text-align: right;">Click the tab key to add additional rows.</p> |  |  |  |  |  |  |
|                                                    |                                                                                                                                                                                |                                                                                                                                                                                                                                                                                                                                                                           |  |  |  |  |  |  |
|                                                    |                                                                                                                                                                                |                                                                                                                                                                                                                                                                                                                                                                           |  |  |  |  |  |  |
|                                                    |                                                                                                                                                                                |                                                                                                                                                                                                                                                                                                                                                                           |  |  |  |  |  |  |
| Time frame: past 36 months                         |                                                                                                                                                                                |                                                                                                                                                                                                                                                                                                                                                                           |  |  |  |  |  |  |
| <b>2</b>                                           | Grants or contracts from any entity (if not indicated in item #1 above).                                                                                                       | <input checked="" type="checkbox"/> <b>None</b><br><table border="1" style="width: 100%; height: 40px; margin-top: 5px;"> <tr><td style="width: 60%;"></td><td style="width: 40%;"></td></tr> <tr><td></td><td></td></tr> <tr><td></td><td></td></tr> </table>                                                                                                            |  |  |  |  |  |  |
|                                                    |                                                                                                                                                                                |                                                                                                                                                                                                                                                                                                                                                                           |  |  |  |  |  |  |
|                                                    |                                                                                                                                                                                |                                                                                                                                                                                                                                                                                                                                                                           |  |  |  |  |  |  |
|                                                    |                                                                                                                                                                                |                                                                                                                                                                                                                                                                                                                                                                           |  |  |  |  |  |  |
| <b>3</b>                                           | Royalties or licenses                                                                                                                                                          | <input checked="" type="checkbox"/> <b>None</b><br><table border="1" style="width: 100%; height: 40px; margin-top: 5px;"> <tr><td style="width: 60%;"></td><td style="width: 40%;"></td></tr> <tr><td></td><td></td></tr> <tr><td></td><td></td></tr> </table>                                                                                                            |  |  |  |  |  |  |
|                                                    |                                                                                                                                                                                |                                                                                                                                                                                                                                                                                                                                                                           |  |  |  |  |  |  |
|                                                    |                                                                                                                                                                                |                                                                                                                                                                                                                                                                                                                                                                           |  |  |  |  |  |  |
|                                                    |                                                                                                                                                                                |                                                                                                                                                                                                                                                                                                                                                                           |  |  |  |  |  |  |

|    |                                                                                                              | Name all entities with whom you have this relationship or indicate none (add rows as needed)                                                                                                                                                                                                                                                                           | Specifications/Comments (e.g., if payments were made to you or to your institution) |  |  |  |  |  |  |  |  |
|----|--------------------------------------------------------------------------------------------------------------|------------------------------------------------------------------------------------------------------------------------------------------------------------------------------------------------------------------------------------------------------------------------------------------------------------------------------------------------------------------------|-------------------------------------------------------------------------------------|--|--|--|--|--|--|--|--|
| 4  | Consulting fees                                                                                              | <input checked="" type="checkbox"/> <b>None</b><br><table border="1" style="width: 100%; border-collapse: collapse;"> <tr><td style="width: 50%; height: 15px;"></td><td style="width: 50%;"></td></tr> <tr><td style="height: 15px;"></td><td></td></tr> <tr><td style="height: 15px;"></td><td></td></tr> <tr><td style="height: 15px;"></td><td></td></tr> </table> |                                                                                     |  |  |  |  |  |  |  |  |
|    |                                                                                                              |                                                                                                                                                                                                                                                                                                                                                                        |                                                                                     |  |  |  |  |  |  |  |  |
|    |                                                                                                              |                                                                                                                                                                                                                                                                                                                                                                        |                                                                                     |  |  |  |  |  |  |  |  |
|    |                                                                                                              |                                                                                                                                                                                                                                                                                                                                                                        |                                                                                     |  |  |  |  |  |  |  |  |
|    |                                                                                                              |                                                                                                                                                                                                                                                                                                                                                                        |                                                                                     |  |  |  |  |  |  |  |  |
| 5  | Payment or honoraria for lectures, presentations, speakers bureaus, manuscript writing or educational events | <input checked="" type="checkbox"/> <b>None</b><br><table border="1" style="width: 100%; border-collapse: collapse;"> <tr><td style="width: 50%; height: 15px;"></td><td style="width: 50%;"></td></tr> <tr><td style="height: 15px;"></td><td></td></tr> <tr><td style="height: 15px;"></td><td></td></tr> </table>                                                   |                                                                                     |  |  |  |  |  |  |  |  |
|    |                                                                                                              |                                                                                                                                                                                                                                                                                                                                                                        |                                                                                     |  |  |  |  |  |  |  |  |
|    |                                                                                                              |                                                                                                                                                                                                                                                                                                                                                                        |                                                                                     |  |  |  |  |  |  |  |  |
|    |                                                                                                              |                                                                                                                                                                                                                                                                                                                                                                        |                                                                                     |  |  |  |  |  |  |  |  |
| 6  | Payment for expert testimony                                                                                 | <input checked="" type="checkbox"/> <b>None</b><br><table border="1" style="width: 100%; border-collapse: collapse;"> <tr><td style="width: 50%; height: 15px;"></td><td style="width: 50%;"></td></tr> <tr><td style="height: 15px;"></td><td></td></tr> <tr><td style="height: 15px;"></td><td></td></tr> </table>                                                   |                                                                                     |  |  |  |  |  |  |  |  |
|    |                                                                                                              |                                                                                                                                                                                                                                                                                                                                                                        |                                                                                     |  |  |  |  |  |  |  |  |
|    |                                                                                                              |                                                                                                                                                                                                                                                                                                                                                                        |                                                                                     |  |  |  |  |  |  |  |  |
|    |                                                                                                              |                                                                                                                                                                                                                                                                                                                                                                        |                                                                                     |  |  |  |  |  |  |  |  |
| 7  | Support for attending meetings and/or travel                                                                 | <input checked="" type="checkbox"/> <b>None</b><br><table border="1" style="width: 100%; border-collapse: collapse;"> <tr><td style="width: 50%; height: 15px;"></td><td style="width: 50%;"></td></tr> <tr><td style="height: 15px;"></td><td></td></tr> <tr><td style="height: 15px;"></td><td></td></tr> </table>                                                   |                                                                                     |  |  |  |  |  |  |  |  |
|    |                                                                                                              |                                                                                                                                                                                                                                                                                                                                                                        |                                                                                     |  |  |  |  |  |  |  |  |
|    |                                                                                                              |                                                                                                                                                                                                                                                                                                                                                                        |                                                                                     |  |  |  |  |  |  |  |  |
|    |                                                                                                              |                                                                                                                                                                                                                                                                                                                                                                        |                                                                                     |  |  |  |  |  |  |  |  |
| 8  | Patents planned, issued or pending                                                                           | <input checked="" type="checkbox"/> <b>None</b><br><table border="1" style="width: 100%; border-collapse: collapse;"> <tr><td style="width: 50%; height: 15px;"></td><td style="width: 50%;"></td></tr> <tr><td style="height: 15px;"></td><td></td></tr> <tr><td style="height: 15px;"></td><td></td></tr> </table>                                                   |                                                                                     |  |  |  |  |  |  |  |  |
|    |                                                                                                              |                                                                                                                                                                                                                                                                                                                                                                        |                                                                                     |  |  |  |  |  |  |  |  |
|    |                                                                                                              |                                                                                                                                                                                                                                                                                                                                                                        |                                                                                     |  |  |  |  |  |  |  |  |
|    |                                                                                                              |                                                                                                                                                                                                                                                                                                                                                                        |                                                                                     |  |  |  |  |  |  |  |  |
| 9  | Participation on a Data Safety Monitoring Board or Advisory Board                                            | <input checked="" type="checkbox"/> <b>None</b><br><table border="1" style="width: 100%; border-collapse: collapse;"> <tr><td style="width: 50%; height: 15px;"></td><td style="width: 50%;"></td></tr> <tr><td style="height: 15px;"></td><td></td></tr> <tr><td style="height: 15px;"></td><td></td></tr> </table>                                                   |                                                                                     |  |  |  |  |  |  |  |  |
|    |                                                                                                              |                                                                                                                                                                                                                                                                                                                                                                        |                                                                                     |  |  |  |  |  |  |  |  |
|    |                                                                                                              |                                                                                                                                                                                                                                                                                                                                                                        |                                                                                     |  |  |  |  |  |  |  |  |
|    |                                                                                                              |                                                                                                                                                                                                                                                                                                                                                                        |                                                                                     |  |  |  |  |  |  |  |  |
| 10 | Leadership or fiduciary role in other board, society, committee or advocacy group, paid or unpaid            | <input checked="" type="checkbox"/> <b>None</b><br><table border="1" style="width: 100%; border-collapse: collapse;"> <tr><td style="width: 50%; height: 15px;"></td><td style="width: 50%;"></td></tr> <tr><td style="height: 15px;"></td><td></td></tr> <tr><td style="height: 15px;"></td><td></td></tr> </table>                                                   |                                                                                     |  |  |  |  |  |  |  |  |
|    |                                                                                                              |                                                                                                                                                                                                                                                                                                                                                                        |                                                                                     |  |  |  |  |  |  |  |  |
|    |                                                                                                              |                                                                                                                                                                                                                                                                                                                                                                        |                                                                                     |  |  |  |  |  |  |  |  |
|    |                                                                                                              |                                                                                                                                                                                                                                                                                                                                                                        |                                                                                     |  |  |  |  |  |  |  |  |

|           |                                                                                  | Name all entities with whom you have this relationship or indicate none (add rows as needed)                                                                                                                                                                                                                         | Specifications/Comments (e.g., if payments were made to you or to your institution) |  |  |  |  |  |  |
|-----------|----------------------------------------------------------------------------------|----------------------------------------------------------------------------------------------------------------------------------------------------------------------------------------------------------------------------------------------------------------------------------------------------------------------|-------------------------------------------------------------------------------------|--|--|--|--|--|--|
| <b>11</b> | Stock or stock options                                                           | <input checked="" type="checkbox"/> <b>None</b><br><table border="1" style="width: 100%; border-collapse: collapse;"> <tr><td style="width: 50%; height: 20px;"></td><td style="width: 50%;"></td></tr> <tr><td style="height: 20px;"></td><td></td></tr> <tr><td style="height: 20px;"></td><td></td></tr> </table> |                                                                                     |  |  |  |  |  |  |
|           |                                                                                  |                                                                                                                                                                                                                                                                                                                      |                                                                                     |  |  |  |  |  |  |
|           |                                                                                  |                                                                                                                                                                                                                                                                                                                      |                                                                                     |  |  |  |  |  |  |
|           |                                                                                  |                                                                                                                                                                                                                                                                                                                      |                                                                                     |  |  |  |  |  |  |
| <b>12</b> | Receipt of equipment, materials, drugs, medical writing, gifts or other services | <input checked="" type="checkbox"/> <b>None</b><br><table border="1" style="width: 100%; border-collapse: collapse;"> <tr><td style="width: 50%; height: 20px;"></td><td style="width: 50%;"></td></tr> <tr><td style="height: 20px;"></td><td></td></tr> <tr><td style="height: 20px;"></td><td></td></tr> </table> |                                                                                     |  |  |  |  |  |  |
|           |                                                                                  |                                                                                                                                                                                                                                                                                                                      |                                                                                     |  |  |  |  |  |  |
|           |                                                                                  |                                                                                                                                                                                                                                                                                                                      |                                                                                     |  |  |  |  |  |  |
|           |                                                                                  |                                                                                                                                                                                                                                                                                                                      |                                                                                     |  |  |  |  |  |  |
| <b>13</b> | Other financial or non-financial interests                                       | <input checked="" type="checkbox"/> <b>None</b><br><table border="1" style="width: 100%; border-collapse: collapse;"> <tr><td style="width: 50%; height: 20px;"></td><td style="width: 50%;"></td></tr> <tr><td style="height: 20px;"></td><td></td></tr> <tr><td style="height: 20px;"></td><td></td></tr> </table> |                                                                                     |  |  |  |  |  |  |
|           |                                                                                  |                                                                                                                                                                                                                                                                                                                      |                                                                                     |  |  |  |  |  |  |
|           |                                                                                  |                                                                                                                                                                                                                                                                                                                      |                                                                                     |  |  |  |  |  |  |
|           |                                                                                  |                                                                                                                                                                                                                                                                                                                      |                                                                                     |  |  |  |  |  |  |

**Please place an "X" next to the following statement to indicate your agreement:**

I certify that I have answered every question and have not altered the wording of any of the questions on this form.

## ICMJE DISCLOSURE FORM

**Date:** 01032023

**Your Name:** Jianqun Kou

**Manuscript Title:** Discovery and Validation of Graft-specific Biomarkers for Risk of Chronic Graft-Versus-Host Disease and Mortality

**Manuscript Number (if known):** 168575-JCI-CMED-1

In the interest of transparency, we ask you to disclose all relationships/activities/interests listed below that are related to the content of your manuscript. "Related" means any relation with for-profit or not-for-profit third parties whose interests may be affected by the content of the manuscript. Disclosure represents a commitment to transparency and does not necessarily indicate a bias. If you are in doubt about whether to list a relationship/activity/interest, it is preferable that you do so.

The author's relationships/activities/interests should be defined broadly. For example, if your manuscript pertains to the epidemiology of hypertension, you should declare all relationships with manufacturers of antihypertensive medication, even if that medication is not mentioned in the manuscript.

In item #1 below, report all support for the work reported in this manuscript without time limit. For all other items, the time frame for disclosure is the past 36 months.

|                                                    | Name all entities with whom you have this relationship or indicate none (add rows as needed)                                                                                   | Specifications/Comments (e.g., if payments were made to you or to your institution)                                                                                                                                                                                                                                                                   |  |  |  |  |  |  |
|----------------------------------------------------|--------------------------------------------------------------------------------------------------------------------------------------------------------------------------------|-------------------------------------------------------------------------------------------------------------------------------------------------------------------------------------------------------------------------------------------------------------------------------------------------------------------------------------------------------|--|--|--|--|--|--|
| Time frame: Since the initial planning of the work |                                                                                                                                                                                |                                                                                                                                                                                                                                                                                                                                                       |  |  |  |  |  |  |
| <b>1</b>                                           | All support for the present manuscript (e.g., funding, provision of study materials, medical writing, article processing charges, etc.)<br><b>No time limit for this item.</b> | <input checked="" type="checkbox"/> <b>None</b><br><table border="1" style="width: 100%; height: 40px; margin-top: 5px;"> <tr><td style="width: 60%;"></td><td></td></tr> <tr><td></td><td></td></tr> <tr><td></td><td></td></tr> </table> <p style="font-size: small; color: gray; text-align: right;">Click the tab key to add additional rows.</p> |  |  |  |  |  |  |
|                                                    |                                                                                                                                                                                |                                                                                                                                                                                                                                                                                                                                                       |  |  |  |  |  |  |
|                                                    |                                                                                                                                                                                |                                                                                                                                                                                                                                                                                                                                                       |  |  |  |  |  |  |
|                                                    |                                                                                                                                                                                |                                                                                                                                                                                                                                                                                                                                                       |  |  |  |  |  |  |
| Time frame: past 36 months                         |                                                                                                                                                                                |                                                                                                                                                                                                                                                                                                                                                       |  |  |  |  |  |  |
| <b>2</b>                                           | Grants or contracts from any entity (if not indicated in item #1 above).                                                                                                       | <input checked="" type="checkbox"/> <b>None</b><br><table border="1" style="width: 100%; height: 40px; margin-top: 5px;"> <tr><td style="width: 60%;"></td><td></td></tr> <tr><td></td><td></td></tr> <tr><td></td><td></td></tr> </table>                                                                                                            |  |  |  |  |  |  |
|                                                    |                                                                                                                                                                                |                                                                                                                                                                                                                                                                                                                                                       |  |  |  |  |  |  |
|                                                    |                                                                                                                                                                                |                                                                                                                                                                                                                                                                                                                                                       |  |  |  |  |  |  |
|                                                    |                                                                                                                                                                                |                                                                                                                                                                                                                                                                                                                                                       |  |  |  |  |  |  |
| <b>3</b>                                           | Royalties or licenses                                                                                                                                                          | <input checked="" type="checkbox"/> <b>None</b><br><table border="1" style="width: 100%; height: 40px; margin-top: 5px;"> <tr><td style="width: 60%;"></td><td></td></tr> <tr><td></td><td></td></tr> <tr><td></td><td></td></tr> </table>                                                                                                            |  |  |  |  |  |  |
|                                                    |                                                                                                                                                                                |                                                                                                                                                                                                                                                                                                                                                       |  |  |  |  |  |  |
|                                                    |                                                                                                                                                                                |                                                                                                                                                                                                                                                                                                                                                       |  |  |  |  |  |  |
|                                                    |                                                                                                                                                                                |                                                                                                                                                                                                                                                                                                                                                       |  |  |  |  |  |  |

|    |                                                                                                              | Name all entities with whom you have this relationship or indicate none (add rows as needed)                                                                                                                                                                                                                                                                           | Specifications/Comments (e.g., if payments were made to you or to your institution) |  |  |  |  |  |  |  |  |
|----|--------------------------------------------------------------------------------------------------------------|------------------------------------------------------------------------------------------------------------------------------------------------------------------------------------------------------------------------------------------------------------------------------------------------------------------------------------------------------------------------|-------------------------------------------------------------------------------------|--|--|--|--|--|--|--|--|
| 4  | Consulting fees                                                                                              | <input checked="" type="checkbox"/> <b>None</b><br><table border="1" style="width: 100%; border-collapse: collapse;"> <tr><td style="width: 50%; height: 15px;"></td><td style="width: 50%;"></td></tr> <tr><td style="height: 15px;"></td><td></td></tr> <tr><td style="height: 15px;"></td><td></td></tr> <tr><td style="height: 15px;"></td><td></td></tr> </table> |                                                                                     |  |  |  |  |  |  |  |  |
|    |                                                                                                              |                                                                                                                                                                                                                                                                                                                                                                        |                                                                                     |  |  |  |  |  |  |  |  |
|    |                                                                                                              |                                                                                                                                                                                                                                                                                                                                                                        |                                                                                     |  |  |  |  |  |  |  |  |
|    |                                                                                                              |                                                                                                                                                                                                                                                                                                                                                                        |                                                                                     |  |  |  |  |  |  |  |  |
|    |                                                                                                              |                                                                                                                                                                                                                                                                                                                                                                        |                                                                                     |  |  |  |  |  |  |  |  |
| 5  | Payment or honoraria for lectures, presentations, speakers bureaus, manuscript writing or educational events | <input checked="" type="checkbox"/> <b>None</b><br><table border="1" style="width: 100%; border-collapse: collapse;"> <tr><td style="width: 50%; height: 15px;"></td><td style="width: 50%;"></td></tr> <tr><td style="height: 15px;"></td><td></td></tr> <tr><td style="height: 15px;"></td><td></td></tr> </table>                                                   |                                                                                     |  |  |  |  |  |  |  |  |
|    |                                                                                                              |                                                                                                                                                                                                                                                                                                                                                                        |                                                                                     |  |  |  |  |  |  |  |  |
|    |                                                                                                              |                                                                                                                                                                                                                                                                                                                                                                        |                                                                                     |  |  |  |  |  |  |  |  |
|    |                                                                                                              |                                                                                                                                                                                                                                                                                                                                                                        |                                                                                     |  |  |  |  |  |  |  |  |
| 6  | Payment for expert testimony                                                                                 | <input checked="" type="checkbox"/> <b>None</b><br><table border="1" style="width: 100%; border-collapse: collapse;"> <tr><td style="width: 50%; height: 15px;"></td><td style="width: 50%;"></td></tr> <tr><td style="height: 15px;"></td><td></td></tr> <tr><td style="height: 15px;"></td><td></td></tr> </table>                                                   |                                                                                     |  |  |  |  |  |  |  |  |
|    |                                                                                                              |                                                                                                                                                                                                                                                                                                                                                                        |                                                                                     |  |  |  |  |  |  |  |  |
|    |                                                                                                              |                                                                                                                                                                                                                                                                                                                                                                        |                                                                                     |  |  |  |  |  |  |  |  |
|    |                                                                                                              |                                                                                                                                                                                                                                                                                                                                                                        |                                                                                     |  |  |  |  |  |  |  |  |
| 7  | Support for attending meetings and/or travel                                                                 | <input checked="" type="checkbox"/> <b>None</b><br><table border="1" style="width: 100%; border-collapse: collapse;"> <tr><td style="width: 50%; height: 15px;"></td><td style="width: 50%;"></td></tr> <tr><td style="height: 15px;"></td><td></td></tr> <tr><td style="height: 15px;"></td><td></td></tr> </table>                                                   |                                                                                     |  |  |  |  |  |  |  |  |
|    |                                                                                                              |                                                                                                                                                                                                                                                                                                                                                                        |                                                                                     |  |  |  |  |  |  |  |  |
|    |                                                                                                              |                                                                                                                                                                                                                                                                                                                                                                        |                                                                                     |  |  |  |  |  |  |  |  |
|    |                                                                                                              |                                                                                                                                                                                                                                                                                                                                                                        |                                                                                     |  |  |  |  |  |  |  |  |
| 8  | Patents planned, issued or pending                                                                           | <input checked="" type="checkbox"/> <b>None</b><br><table border="1" style="width: 100%; border-collapse: collapse;"> <tr><td style="width: 50%; height: 15px;"></td><td style="width: 50%;"></td></tr> <tr><td style="height: 15px;"></td><td></td></tr> <tr><td style="height: 15px;"></td><td></td></tr> </table>                                                   |                                                                                     |  |  |  |  |  |  |  |  |
|    |                                                                                                              |                                                                                                                                                                                                                                                                                                                                                                        |                                                                                     |  |  |  |  |  |  |  |  |
|    |                                                                                                              |                                                                                                                                                                                                                                                                                                                                                                        |                                                                                     |  |  |  |  |  |  |  |  |
|    |                                                                                                              |                                                                                                                                                                                                                                                                                                                                                                        |                                                                                     |  |  |  |  |  |  |  |  |
| 9  | Participation on a Data Safety Monitoring Board or Advisory Board                                            | <input checked="" type="checkbox"/> <b>None</b><br><table border="1" style="width: 100%; border-collapse: collapse;"> <tr><td style="width: 50%; height: 15px;"></td><td style="width: 50%;"></td></tr> <tr><td style="height: 15px;"></td><td></td></tr> <tr><td style="height: 15px;"></td><td></td></tr> </table>                                                   |                                                                                     |  |  |  |  |  |  |  |  |
|    |                                                                                                              |                                                                                                                                                                                                                                                                                                                                                                        |                                                                                     |  |  |  |  |  |  |  |  |
|    |                                                                                                              |                                                                                                                                                                                                                                                                                                                                                                        |                                                                                     |  |  |  |  |  |  |  |  |
|    |                                                                                                              |                                                                                                                                                                                                                                                                                                                                                                        |                                                                                     |  |  |  |  |  |  |  |  |
| 10 | Leadership or fiduciary role in other board, society, committee or advocacy group, paid or unpaid            | <input checked="" type="checkbox"/> <b>None</b><br><table border="1" style="width: 100%; border-collapse: collapse;"> <tr><td style="width: 50%; height: 15px;"></td><td style="width: 50%;"></td></tr> <tr><td style="height: 15px;"></td><td></td></tr> <tr><td style="height: 15px;"></td><td></td></tr> </table>                                                   |                                                                                     |  |  |  |  |  |  |  |  |
|    |                                                                                                              |                                                                                                                                                                                                                                                                                                                                                                        |                                                                                     |  |  |  |  |  |  |  |  |
|    |                                                                                                              |                                                                                                                                                                                                                                                                                                                                                                        |                                                                                     |  |  |  |  |  |  |  |  |
|    |                                                                                                              |                                                                                                                                                                                                                                                                                                                                                                        |                                                                                     |  |  |  |  |  |  |  |  |

|           |                                                                                  | Name all entities with whom you have this relationship or indicate none (add rows as needed)                                                                                                                                                                                                                         | Specifications/Comments (e.g., if payments were made to you or to your institution) |  |  |  |  |  |  |
|-----------|----------------------------------------------------------------------------------|----------------------------------------------------------------------------------------------------------------------------------------------------------------------------------------------------------------------------------------------------------------------------------------------------------------------|-------------------------------------------------------------------------------------|--|--|--|--|--|--|
| <b>11</b> | Stock or stock options                                                           | <input checked="" type="checkbox"/> <b>None</b><br><table border="1" style="width: 100%; border-collapse: collapse;"> <tr><td style="width: 50%; height: 20px;"></td><td style="width: 50%;"></td></tr> <tr><td style="height: 20px;"></td><td></td></tr> <tr><td style="height: 20px;"></td><td></td></tr> </table> |                                                                                     |  |  |  |  |  |  |
|           |                                                                                  |                                                                                                                                                                                                                                                                                                                      |                                                                                     |  |  |  |  |  |  |
|           |                                                                                  |                                                                                                                                                                                                                                                                                                                      |                                                                                     |  |  |  |  |  |  |
|           |                                                                                  |                                                                                                                                                                                                                                                                                                                      |                                                                                     |  |  |  |  |  |  |
| <b>12</b> | Receipt of equipment, materials, drugs, medical writing, gifts or other services | <input checked="" type="checkbox"/> <b>None</b><br><table border="1" style="width: 100%; border-collapse: collapse;"> <tr><td style="width: 50%; height: 20px;"></td><td style="width: 50%;"></td></tr> <tr><td style="height: 20px;"></td><td></td></tr> <tr><td style="height: 20px;"></td><td></td></tr> </table> |                                                                                     |  |  |  |  |  |  |
|           |                                                                                  |                                                                                                                                                                                                                                                                                                                      |                                                                                     |  |  |  |  |  |  |
|           |                                                                                  |                                                                                                                                                                                                                                                                                                                      |                                                                                     |  |  |  |  |  |  |
|           |                                                                                  |                                                                                                                                                                                                                                                                                                                      |                                                                                     |  |  |  |  |  |  |
| <b>13</b> | Other financial or non-financial interests                                       | <input checked="" type="checkbox"/> <b>None</b><br><table border="1" style="width: 100%; border-collapse: collapse;"> <tr><td style="width: 50%; height: 20px;"></td><td style="width: 50%;"></td></tr> <tr><td style="height: 20px;"></td><td></td></tr> <tr><td style="height: 20px;"></td><td></td></tr> </table> |                                                                                     |  |  |  |  |  |  |
|           |                                                                                  |                                                                                                                                                                                                                                                                                                                      |                                                                                     |  |  |  |  |  |  |
|           |                                                                                  |                                                                                                                                                                                                                                                                                                                      |                                                                                     |  |  |  |  |  |  |
|           |                                                                                  |                                                                                                                                                                                                                                                                                                                      |                                                                                     |  |  |  |  |  |  |

**Please place an "X" next to the following statement to indicate your agreement:**

I certify that I have answered every question and have not altered the wording of any of the questions on this form.

## ICMJE DISCLOSURE FORM

**Date:** 01032023

**Your Name:** Brent Logan

**Manuscript Title:** Discovery and Validation of Graft-specific Biomarkers for Risk of Chronic Graft-Versus-Host Disease and Mortality

**Manuscript Number (if known):** 168575-JCI-CMED-1

In the interest of transparency, we ask you to disclose all relationships/activities/interests listed below that are related to the content of your manuscript. "Related" means any relation with for-profit or not-for-profit third parties whose interests may be affected by the content of the manuscript. Disclosure represents a commitment to transparency and does not necessarily indicate a bias. If you are in doubt about whether to list a relationship/activity/interest, it is preferable that you do so.

The author's relationships/activities/interests should be defined broadly. For example, if your manuscript pertains to the epidemiology of hypertension, you should declare all relationships with manufacturers of antihypertensive medication, even if that medication is not mentioned in the manuscript.

In item #1 below, report all support for the work reported in this manuscript without time limit. For all other items, the time frame for disclosure is the past 36 months.

|                                                           |                                                                                                                                                                                | Name all entities with whom you have this relationship or indicate none (add rows as needed)                                                                                                                                               | Specifications/Comments (e.g., if payments were made to you or to your institution) |  |  |  |  |  |                                                                                                                                                                                                                                                                                                  |  |  |  |  |  |  |
|-----------------------------------------------------------|--------------------------------------------------------------------------------------------------------------------------------------------------------------------------------|--------------------------------------------------------------------------------------------------------------------------------------------------------------------------------------------------------------------------------------------|-------------------------------------------------------------------------------------|--|--|--|--|--|--------------------------------------------------------------------------------------------------------------------------------------------------------------------------------------------------------------------------------------------------------------------------------------------------|--|--|--|--|--|--|
| <b>Time frame: Since the initial planning of the work</b> |                                                                                                                                                                                |                                                                                                                                                                                                                                            |                                                                                     |  |  |  |  |  |                                                                                                                                                                                                                                                                                                  |  |  |  |  |  |  |
| <b>1</b>                                                  | All support for the present manuscript (e.g., funding, provision of study materials, medical writing, article processing charges, etc.)<br><b>No time limit for this item.</b> | <input checked="" type="checkbox"/> <b>None</b><br><table border="1" style="width: 100%; height: 40px; margin-top: 5px;"> <tr><td style="width: 60%;"></td><td></td></tr> <tr><td></td><td></td></tr> <tr><td></td><td></td></tr> </table> |                                                                                     |  |  |  |  |  | <table border="1" style="width: 100%; height: 40px; margin-top: 5px;"> <tr><td style="width: 60%;"></td><td></td></tr> <tr><td></td><td></td></tr> <tr><td></td><td></td></tr> </table> <p style="font-size: small; color: gray; margin-top: 5px;">Click the tab key to add additional rows.</p> |  |  |  |  |  |  |
|                                                           |                                                                                                                                                                                |                                                                                                                                                                                                                                            |                                                                                     |  |  |  |  |  |                                                                                                                                                                                                                                                                                                  |  |  |  |  |  |  |
|                                                           |                                                                                                                                                                                |                                                                                                                                                                                                                                            |                                                                                     |  |  |  |  |  |                                                                                                                                                                                                                                                                                                  |  |  |  |  |  |  |
|                                                           |                                                                                                                                                                                |                                                                                                                                                                                                                                            |                                                                                     |  |  |  |  |  |                                                                                                                                                                                                                                                                                                  |  |  |  |  |  |  |
|                                                           |                                                                                                                                                                                |                                                                                                                                                                                                                                            |                                                                                     |  |  |  |  |  |                                                                                                                                                                                                                                                                                                  |  |  |  |  |  |  |
|                                                           |                                                                                                                                                                                |                                                                                                                                                                                                                                            |                                                                                     |  |  |  |  |  |                                                                                                                                                                                                                                                                                                  |  |  |  |  |  |  |
|                                                           |                                                                                                                                                                                |                                                                                                                                                                                                                                            |                                                                                     |  |  |  |  |  |                                                                                                                                                                                                                                                                                                  |  |  |  |  |  |  |
| <b>Time frame: past 36 months</b>                         |                                                                                                                                                                                |                                                                                                                                                                                                                                            |                                                                                     |  |  |  |  |  |                                                                                                                                                                                                                                                                                                  |  |  |  |  |  |  |
| <b>2</b>                                                  | Grants or contracts from any entity (if not indicated in item #1 above).                                                                                                       | <input checked="" type="checkbox"/> <b>None</b><br><table border="1" style="width: 100%; height: 40px; margin-top: 5px;"> <tr><td style="width: 60%;"></td><td></td></tr> <tr><td></td><td></td></tr> <tr><td></td><td></td></tr> </table> |                                                                                     |  |  |  |  |  | <table border="1" style="width: 100%; height: 40px; margin-top: 5px;"> <tr><td style="width: 60%;"></td><td></td></tr> <tr><td></td><td></td></tr> <tr><td></td><td></td></tr> </table>                                                                                                          |  |  |  |  |  |  |
|                                                           |                                                                                                                                                                                |                                                                                                                                                                                                                                            |                                                                                     |  |  |  |  |  |                                                                                                                                                                                                                                                                                                  |  |  |  |  |  |  |
|                                                           |                                                                                                                                                                                |                                                                                                                                                                                                                                            |                                                                                     |  |  |  |  |  |                                                                                                                                                                                                                                                                                                  |  |  |  |  |  |  |
|                                                           |                                                                                                                                                                                |                                                                                                                                                                                                                                            |                                                                                     |  |  |  |  |  |                                                                                                                                                                                                                                                                                                  |  |  |  |  |  |  |
|                                                           |                                                                                                                                                                                |                                                                                                                                                                                                                                            |                                                                                     |  |  |  |  |  |                                                                                                                                                                                                                                                                                                  |  |  |  |  |  |  |
|                                                           |                                                                                                                                                                                |                                                                                                                                                                                                                                            |                                                                                     |  |  |  |  |  |                                                                                                                                                                                                                                                                                                  |  |  |  |  |  |  |
|                                                           |                                                                                                                                                                                |                                                                                                                                                                                                                                            |                                                                                     |  |  |  |  |  |                                                                                                                                                                                                                                                                                                  |  |  |  |  |  |  |
| <b>3</b>                                                  | Royalties or licenses                                                                                                                                                          | <input checked="" type="checkbox"/> <b>None</b><br><table border="1" style="width: 100%; height: 40px; margin-top: 5px;"> <tr><td style="width: 60%;"></td><td></td></tr> <tr><td></td><td></td></tr> <tr><td></td><td></td></tr> </table> |                                                                                     |  |  |  |  |  | <table border="1" style="width: 100%; height: 40px; margin-top: 5px;"> <tr><td style="width: 60%;"></td><td></td></tr> <tr><td></td><td></td></tr> <tr><td></td><td></td></tr> </table>                                                                                                          |  |  |  |  |  |  |
|                                                           |                                                                                                                                                                                |                                                                                                                                                                                                                                            |                                                                                     |  |  |  |  |  |                                                                                                                                                                                                                                                                                                  |  |  |  |  |  |  |
|                                                           |                                                                                                                                                                                |                                                                                                                                                                                                                                            |                                                                                     |  |  |  |  |  |                                                                                                                                                                                                                                                                                                  |  |  |  |  |  |  |
|                                                           |                                                                                                                                                                                |                                                                                                                                                                                                                                            |                                                                                     |  |  |  |  |  |                                                                                                                                                                                                                                                                                                  |  |  |  |  |  |  |
|                                                           |                                                                                                                                                                                |                                                                                                                                                                                                                                            |                                                                                     |  |  |  |  |  |                                                                                                                                                                                                                                                                                                  |  |  |  |  |  |  |
|                                                           |                                                                                                                                                                                |                                                                                                                                                                                                                                            |                                                                                     |  |  |  |  |  |                                                                                                                                                                                                                                                                                                  |  |  |  |  |  |  |
|                                                           |                                                                                                                                                                                |                                                                                                                                                                                                                                            |                                                                                     |  |  |  |  |  |                                                                                                                                                                                                                                                                                                  |  |  |  |  |  |  |

|    |                                                                                                              | Name all entities with whom you have this relationship or indicate none (add rows as needed)                                                                                                                                                                                                                                                                           | Specifications/Comments (e.g., if payments were made to you or to your institution) |  |  |  |  |  |  |  |  |
|----|--------------------------------------------------------------------------------------------------------------|------------------------------------------------------------------------------------------------------------------------------------------------------------------------------------------------------------------------------------------------------------------------------------------------------------------------------------------------------------------------|-------------------------------------------------------------------------------------|--|--|--|--|--|--|--|--|
| 4  | Consulting fees                                                                                              | <input checked="" type="checkbox"/> <b>None</b><br><table border="1" style="width: 100%; border-collapse: collapse;"> <tr><td style="width: 50%; height: 15px;"></td><td style="width: 50%;"></td></tr> <tr><td style="height: 15px;"></td><td></td></tr> <tr><td style="height: 15px;"></td><td></td></tr> <tr><td style="height: 15px;"></td><td></td></tr> </table> |                                                                                     |  |  |  |  |  |  |  |  |
|    |                                                                                                              |                                                                                                                                                                                                                                                                                                                                                                        |                                                                                     |  |  |  |  |  |  |  |  |
|    |                                                                                                              |                                                                                                                                                                                                                                                                                                                                                                        |                                                                                     |  |  |  |  |  |  |  |  |
|    |                                                                                                              |                                                                                                                                                                                                                                                                                                                                                                        |                                                                                     |  |  |  |  |  |  |  |  |
|    |                                                                                                              |                                                                                                                                                                                                                                                                                                                                                                        |                                                                                     |  |  |  |  |  |  |  |  |
| 5  | Payment or honoraria for lectures, presentations, speakers bureaus, manuscript writing or educational events | <input checked="" type="checkbox"/> <b>None</b><br><table border="1" style="width: 100%; border-collapse: collapse;"> <tr><td style="width: 50%; height: 15px;"></td><td style="width: 50%;"></td></tr> <tr><td style="height: 15px;"></td><td></td></tr> <tr><td style="height: 15px;"></td><td></td></tr> </table>                                                   |                                                                                     |  |  |  |  |  |  |  |  |
|    |                                                                                                              |                                                                                                                                                                                                                                                                                                                                                                        |                                                                                     |  |  |  |  |  |  |  |  |
|    |                                                                                                              |                                                                                                                                                                                                                                                                                                                                                                        |                                                                                     |  |  |  |  |  |  |  |  |
|    |                                                                                                              |                                                                                                                                                                                                                                                                                                                                                                        |                                                                                     |  |  |  |  |  |  |  |  |
| 6  | Payment for expert testimony                                                                                 | <input checked="" type="checkbox"/> <b>None</b><br><table border="1" style="width: 100%; border-collapse: collapse;"> <tr><td style="width: 50%; height: 15px;"></td><td style="width: 50%;"></td></tr> <tr><td style="height: 15px;"></td><td></td></tr> <tr><td style="height: 15px;"></td><td></td></tr> </table>                                                   |                                                                                     |  |  |  |  |  |  |  |  |
|    |                                                                                                              |                                                                                                                                                                                                                                                                                                                                                                        |                                                                                     |  |  |  |  |  |  |  |  |
|    |                                                                                                              |                                                                                                                                                                                                                                                                                                                                                                        |                                                                                     |  |  |  |  |  |  |  |  |
|    |                                                                                                              |                                                                                                                                                                                                                                                                                                                                                                        |                                                                                     |  |  |  |  |  |  |  |  |
| 7  | Support for attending meetings and/or travel                                                                 | <input checked="" type="checkbox"/> <b>None</b><br><table border="1" style="width: 100%; border-collapse: collapse;"> <tr><td style="width: 50%; height: 15px;"></td><td style="width: 50%;"></td></tr> <tr><td style="height: 15px;"></td><td></td></tr> <tr><td style="height: 15px;"></td><td></td></tr> </table>                                                   |                                                                                     |  |  |  |  |  |  |  |  |
|    |                                                                                                              |                                                                                                                                                                                                                                                                                                                                                                        |                                                                                     |  |  |  |  |  |  |  |  |
|    |                                                                                                              |                                                                                                                                                                                                                                                                                                                                                                        |                                                                                     |  |  |  |  |  |  |  |  |
|    |                                                                                                              |                                                                                                                                                                                                                                                                                                                                                                        |                                                                                     |  |  |  |  |  |  |  |  |
| 8  | Patents planned, issued or pending                                                                           | <input checked="" type="checkbox"/> <b>None</b><br><table border="1" style="width: 100%; border-collapse: collapse;"> <tr><td style="width: 50%; height: 15px;"></td><td style="width: 50%;"></td></tr> <tr><td style="height: 15px;"></td><td></td></tr> <tr><td style="height: 15px;"></td><td></td></tr> </table>                                                   |                                                                                     |  |  |  |  |  |  |  |  |
|    |                                                                                                              |                                                                                                                                                                                                                                                                                                                                                                        |                                                                                     |  |  |  |  |  |  |  |  |
|    |                                                                                                              |                                                                                                                                                                                                                                                                                                                                                                        |                                                                                     |  |  |  |  |  |  |  |  |
|    |                                                                                                              |                                                                                                                                                                                                                                                                                                                                                                        |                                                                                     |  |  |  |  |  |  |  |  |
| 9  | Participation on a Data Safety Monitoring Board or Advisory Board                                            | <input checked="" type="checkbox"/> <b>None</b><br><table border="1" style="width: 100%; border-collapse: collapse;"> <tr><td style="width: 50%; height: 15px;"></td><td style="width: 50%;"></td></tr> <tr><td style="height: 15px;"></td><td></td></tr> <tr><td style="height: 15px;"></td><td></td></tr> </table>                                                   |                                                                                     |  |  |  |  |  |  |  |  |
|    |                                                                                                              |                                                                                                                                                                                                                                                                                                                                                                        |                                                                                     |  |  |  |  |  |  |  |  |
|    |                                                                                                              |                                                                                                                                                                                                                                                                                                                                                                        |                                                                                     |  |  |  |  |  |  |  |  |
|    |                                                                                                              |                                                                                                                                                                                                                                                                                                                                                                        |                                                                                     |  |  |  |  |  |  |  |  |
| 10 | Leadership or fiduciary role in other board, society, committee or advocacy group, paid or unpaid            | <input checked="" type="checkbox"/> <b>None</b><br><table border="1" style="width: 100%; border-collapse: collapse;"> <tr><td style="width: 50%; height: 15px;"></td><td style="width: 50%;"></td></tr> <tr><td style="height: 15px;"></td><td></td></tr> <tr><td style="height: 15px;"></td><td></td></tr> </table>                                                   |                                                                                     |  |  |  |  |  |  |  |  |
|    |                                                                                                              |                                                                                                                                                                                                                                                                                                                                                                        |                                                                                     |  |  |  |  |  |  |  |  |
|    |                                                                                                              |                                                                                                                                                                                                                                                                                                                                                                        |                                                                                     |  |  |  |  |  |  |  |  |
|    |                                                                                                              |                                                                                                                                                                                                                                                                                                                                                                        |                                                                                     |  |  |  |  |  |  |  |  |

|    |                                                                                  | Name all entities with whom you have this relationship or indicate none (add rows as needed) | Specifications/Comments (e.g., if payments were made to you or to your institution) |
|----|----------------------------------------------------------------------------------|----------------------------------------------------------------------------------------------|-------------------------------------------------------------------------------------|
| 11 | Stock or stock options                                                           | <input checked="" type="checkbox"/> None                                                     |                                                                                     |
|    |                                                                                  |                                                                                              |                                                                                     |
|    |                                                                                  |                                                                                              |                                                                                     |
|    |                                                                                  |                                                                                              |                                                                                     |
| 12 | Receipt of equipment, materials, drugs, medical writing, gifts or other services | <input checked="" type="checkbox"/> None                                                     |                                                                                     |
|    |                                                                                  |                                                                                              |                                                                                     |
|    |                                                                                  |                                                                                              |                                                                                     |
|    |                                                                                  |                                                                                              |                                                                                     |
| 13 | Other financial or non-financial interests                                       | <input checked="" type="checkbox"/> None                                                     |                                                                                     |
|    |                                                                                  |                                                                                              |                                                                                     |
|    |                                                                                  |                                                                                              |                                                                                     |
|    |                                                                                  |                                                                                              |                                                                                     |

Please place an "X" next to the following statement to indicate your agreement:

I certify that I have answered every question and have not altered the wording of any of the questions on this form.

## ICMJE DISCLOSURE FORM

**Date:** 01182023

**Your Name:** Morgan R Little

**Manuscript Title:** Discovery and Validation of Graft-specific Biomarkers for Risk of Chronic Graft-Versus-Host Disease and Mortality

**Manuscript Number (if known):** 168575-JCI-CMED-1

In the interest of transparency, we ask you to disclose all relationships/activities/interests listed below that are related to the content of your manuscript. "Related" means any relation with for-profit or not-for-profit third parties whose interests may be affected by the content of the manuscript. Disclosure represents a commitment to transparency and does not necessarily indicate a bias. If you are in doubt about whether to list a relationship/activity/interest, it is preferable that you do so.

The author's relationships/activities/interests should be defined broadly. For example, if your manuscript pertains to the epidemiology of hypertension, you should declare all relationships with manufacturers of antihypertensive medication, even if that medication is not mentioned in the manuscript.

In item #1 below, report all support for the work reported in this manuscript without time limit. For all other items, the time frame for disclosure is the past 36 months.

|                                                    | Name all entities with whom you have this relationship or indicate none (add rows as needed)                                                                                   | Specifications/Comments (e.g., if payments were made to you or to your institution)                                                                                                                                                                                                                                                                                                                                                             |                                              |                                 |  |  |                                           |  |
|----------------------------------------------------|--------------------------------------------------------------------------------------------------------------------------------------------------------------------------------|-------------------------------------------------------------------------------------------------------------------------------------------------------------------------------------------------------------------------------------------------------------------------------------------------------------------------------------------------------------------------------------------------------------------------------------------------|----------------------------------------------|---------------------------------|--|--|-------------------------------------------|--|
| Time frame: Since the initial planning of the work |                                                                                                                                                                                |                                                                                                                                                                                                                                                                                                                                                                                                                                                 |                                              |                                 |  |  |                                           |  |
| <b>1</b>                                           | All support for the present manuscript (e.g., funding, provision of study materials, medical writing, article processing charges, etc.)<br><b>No time limit for this item.</b> | <input type="checkbox"/> <b>None</b><br><table border="1" style="width: 100%; border-collapse: collapse; margin-top: 5px;"> <tr> <td style="width: 60%;">Dr. Sophie Paczesny's grant: 5P50HD090215-05</td> <td style="width: 40%;">Wages were paid to me via IUPUI</td> </tr> <tr> <td> </td> <td> </td> </tr> <tr> <td colspan="2" style="text-align: center; font-size: small;">Click the tab key to add additional rows.</td> </tr> </table> | Dr. Sophie Paczesny's grant: 5P50HD090215-05 | Wages were paid to me via IUPUI |  |  | Click the tab key to add additional rows. |  |
| Dr. Sophie Paczesny's grant: 5P50HD090215-05       | Wages were paid to me via IUPUI                                                                                                                                                |                                                                                                                                                                                                                                                                                                                                                                                                                                                 |                                              |                                 |  |  |                                           |  |
|                                                    |                                                                                                                                                                                |                                                                                                                                                                                                                                                                                                                                                                                                                                                 |                                              |                                 |  |  |                                           |  |
| Click the tab key to add additional rows.          |                                                                                                                                                                                |                                                                                                                                                                                                                                                                                                                                                                                                                                                 |                                              |                                 |  |  |                                           |  |
| Time frame: past 36 months                         |                                                                                                                                                                                |                                                                                                                                                                                                                                                                                                                                                                                                                                                 |                                              |                                 |  |  |                                           |  |
| <b>2</b>                                           | Grants or contracts from any entity (if not indicated in item #1 above).                                                                                                       | <input checked="" type="checkbox"/> <b>None</b><br><table border="1" style="width: 100%; border-collapse: collapse; margin-top: 5px;"> <tr><td> </td><td> </td></tr> <tr><td> </td><td> </td></tr> <tr><td> </td><td> </td></tr> </table>                                                                                                                                                                                                       |                                              |                                 |  |  |                                           |  |
|                                                    |                                                                                                                                                                                |                                                                                                                                                                                                                                                                                                                                                                                                                                                 |                                              |                                 |  |  |                                           |  |
|                                                    |                                                                                                                                                                                |                                                                                                                                                                                                                                                                                                                                                                                                                                                 |                                              |                                 |  |  |                                           |  |
|                                                    |                                                                                                                                                                                |                                                                                                                                                                                                                                                                                                                                                                                                                                                 |                                              |                                 |  |  |                                           |  |
| <b>3</b>                                           | Royalties or licenses                                                                                                                                                          | <input checked="" type="checkbox"/> <b>None</b><br><table border="1" style="width: 100%; border-collapse: collapse; margin-top: 5px;"> <tr><td> </td><td> </td></tr> <tr><td> </td><td> </td></tr> <tr><td> </td><td> </td></tr> </table>                                                                                                                                                                                                       |                                              |                                 |  |  |                                           |  |
|                                                    |                                                                                                                                                                                |                                                                                                                                                                                                                                                                                                                                                                                                                                                 |                                              |                                 |  |  |                                           |  |
|                                                    |                                                                                                                                                                                |                                                                                                                                                                                                                                                                                                                                                                                                                                                 |                                              |                                 |  |  |                                           |  |
|                                                    |                                                                                                                                                                                |                                                                                                                                                                                                                                                                                                                                                                                                                                                 |                                              |                                 |  |  |                                           |  |

|    |                                                                                                              | Name all entities with whom you have this relationship or indicate none (add rows as needed)                                                                                                                                                                                                                                                                           | Specifications/Comments (e.g., if payments were made to you or to your institution) |  |  |  |  |  |  |  |  |
|----|--------------------------------------------------------------------------------------------------------------|------------------------------------------------------------------------------------------------------------------------------------------------------------------------------------------------------------------------------------------------------------------------------------------------------------------------------------------------------------------------|-------------------------------------------------------------------------------------|--|--|--|--|--|--|--|--|
| 4  | Consulting fees                                                                                              | <input checked="" type="checkbox"/> <b>None</b><br><table border="1" style="width: 100%; border-collapse: collapse;"> <tr><td style="width: 50%; height: 15px;"></td><td style="width: 50%;"></td></tr> <tr><td style="height: 15px;"></td><td></td></tr> <tr><td style="height: 15px;"></td><td></td></tr> <tr><td style="height: 15px;"></td><td></td></tr> </table> |                                                                                     |  |  |  |  |  |  |  |  |
|    |                                                                                                              |                                                                                                                                                                                                                                                                                                                                                                        |                                                                                     |  |  |  |  |  |  |  |  |
|    |                                                                                                              |                                                                                                                                                                                                                                                                                                                                                                        |                                                                                     |  |  |  |  |  |  |  |  |
|    |                                                                                                              |                                                                                                                                                                                                                                                                                                                                                                        |                                                                                     |  |  |  |  |  |  |  |  |
|    |                                                                                                              |                                                                                                                                                                                                                                                                                                                                                                        |                                                                                     |  |  |  |  |  |  |  |  |
| 5  | Payment or honoraria for lectures, presentations, speakers bureaus, manuscript writing or educational events | <input checked="" type="checkbox"/> <b>None</b><br><table border="1" style="width: 100%; border-collapse: collapse;"> <tr><td style="width: 50%; height: 15px;"></td><td style="width: 50%;"></td></tr> <tr><td style="height: 15px;"></td><td></td></tr> <tr><td style="height: 15px;"></td><td></td></tr> </table>                                                   |                                                                                     |  |  |  |  |  |  |  |  |
|    |                                                                                                              |                                                                                                                                                                                                                                                                                                                                                                        |                                                                                     |  |  |  |  |  |  |  |  |
|    |                                                                                                              |                                                                                                                                                                                                                                                                                                                                                                        |                                                                                     |  |  |  |  |  |  |  |  |
|    |                                                                                                              |                                                                                                                                                                                                                                                                                                                                                                        |                                                                                     |  |  |  |  |  |  |  |  |
| 6  | Payment for expert testimony                                                                                 | <input checked="" type="checkbox"/> <b>None</b><br><table border="1" style="width: 100%; border-collapse: collapse;"> <tr><td style="width: 50%; height: 15px;"></td><td style="width: 50%;"></td></tr> <tr><td style="height: 15px;"></td><td></td></tr> <tr><td style="height: 15px;"></td><td></td></tr> </table>                                                   |                                                                                     |  |  |  |  |  |  |  |  |
|    |                                                                                                              |                                                                                                                                                                                                                                                                                                                                                                        |                                                                                     |  |  |  |  |  |  |  |  |
|    |                                                                                                              |                                                                                                                                                                                                                                                                                                                                                                        |                                                                                     |  |  |  |  |  |  |  |  |
|    |                                                                                                              |                                                                                                                                                                                                                                                                                                                                                                        |                                                                                     |  |  |  |  |  |  |  |  |
| 7  | Support for attending meetings and/or travel                                                                 | <input checked="" type="checkbox"/> <b>None</b><br><table border="1" style="width: 100%; border-collapse: collapse;"> <tr><td style="width: 50%; height: 15px;"></td><td style="width: 50%;"></td></tr> <tr><td style="height: 15px;"></td><td></td></tr> <tr><td style="height: 15px;"></td><td></td></tr> </table>                                                   |                                                                                     |  |  |  |  |  |  |  |  |
|    |                                                                                                              |                                                                                                                                                                                                                                                                                                                                                                        |                                                                                     |  |  |  |  |  |  |  |  |
|    |                                                                                                              |                                                                                                                                                                                                                                                                                                                                                                        |                                                                                     |  |  |  |  |  |  |  |  |
|    |                                                                                                              |                                                                                                                                                                                                                                                                                                                                                                        |                                                                                     |  |  |  |  |  |  |  |  |
| 8  | Patents planned, issued or pending                                                                           | <input checked="" type="checkbox"/> <b>None</b><br><table border="1" style="width: 100%; border-collapse: collapse;"> <tr><td style="width: 50%; height: 15px;"></td><td style="width: 50%;"></td></tr> <tr><td style="height: 15px;"></td><td></td></tr> <tr><td style="height: 15px;"></td><td></td></tr> </table>                                                   |                                                                                     |  |  |  |  |  |  |  |  |
|    |                                                                                                              |                                                                                                                                                                                                                                                                                                                                                                        |                                                                                     |  |  |  |  |  |  |  |  |
|    |                                                                                                              |                                                                                                                                                                                                                                                                                                                                                                        |                                                                                     |  |  |  |  |  |  |  |  |
|    |                                                                                                              |                                                                                                                                                                                                                                                                                                                                                                        |                                                                                     |  |  |  |  |  |  |  |  |
| 9  | Participation on a Data Safety Monitoring Board or Advisory Board                                            | <input checked="" type="checkbox"/> <b>None</b><br><table border="1" style="width: 100%; border-collapse: collapse;"> <tr><td style="width: 50%; height: 15px;"></td><td style="width: 50%;"></td></tr> <tr><td style="height: 15px;"></td><td></td></tr> <tr><td style="height: 15px;"></td><td></td></tr> </table>                                                   |                                                                                     |  |  |  |  |  |  |  |  |
|    |                                                                                                              |                                                                                                                                                                                                                                                                                                                                                                        |                                                                                     |  |  |  |  |  |  |  |  |
|    |                                                                                                              |                                                                                                                                                                                                                                                                                                                                                                        |                                                                                     |  |  |  |  |  |  |  |  |
|    |                                                                                                              |                                                                                                                                                                                                                                                                                                                                                                        |                                                                                     |  |  |  |  |  |  |  |  |
| 10 | Leadership or fiduciary role in other board, society, committee or advocacy group, paid or unpaid            | <input checked="" type="checkbox"/> <b>None</b><br><table border="1" style="width: 100%; border-collapse: collapse;"> <tr><td style="width: 50%; height: 15px;"></td><td style="width: 50%;"></td></tr> <tr><td style="height: 15px;"></td><td></td></tr> <tr><td style="height: 15px;"></td><td></td></tr> </table>                                                   |                                                                                     |  |  |  |  |  |  |  |  |
|    |                                                                                                              |                                                                                                                                                                                                                                                                                                                                                                        |                                                                                     |  |  |  |  |  |  |  |  |
|    |                                                                                                              |                                                                                                                                                                                                                                                                                                                                                                        |                                                                                     |  |  |  |  |  |  |  |  |
|    |                                                                                                              |                                                                                                                                                                                                                                                                                                                                                                        |                                                                                     |  |  |  |  |  |  |  |  |

|    |                                                                                  | Name all entities with whom you have this relationship or indicate none (add rows as needed) | Specifications/Comments (e.g., if payments were made to you or to your institution) |
|----|----------------------------------------------------------------------------------|----------------------------------------------------------------------------------------------|-------------------------------------------------------------------------------------|
| 11 | Stock or stock options                                                           | <input checked="" type="checkbox"/> None                                                     |                                                                                     |
|    |                                                                                  |                                                                                              |                                                                                     |
|    |                                                                                  |                                                                                              |                                                                                     |
|    |                                                                                  |                                                                                              |                                                                                     |
| 12 | Receipt of equipment, materials, drugs, medical writing, gifts or other services | <input checked="" type="checkbox"/> None                                                     |                                                                                     |
|    |                                                                                  |                                                                                              |                                                                                     |
|    |                                                                                  |                                                                                              |                                                                                     |
|    |                                                                                  |                                                                                              |                                                                                     |
| 13 | Other financial or non-financial interests                                       | <input checked="" type="checkbox"/> None                                                     |                                                                                     |
|    |                                                                                  |                                                                                              |                                                                                     |
|    |                                                                                  |                                                                                              |                                                                                     |
|    |                                                                                  |                                                                                              |                                                                                     |

Please place an "X" next to the following statement to indicate your agreement:

I certify that I have answered every question and have not altered the wording of any of the questions on this form.

## ICMJE DISCLOSURE FORM

**Date:** 01032023

**Your Name:** Philip R. Gafken

**Manuscript Title:** Discovery and Validation of Graft-specific Biomarkers for Risk of Chronic Graft-Versus-Host Disease and Mortality

**Manuscript Number (if known):** 168575-JCI-CMED-1

In the interest of transparency, we ask you to disclose all relationships/activities/interests listed below that are related to the content of your manuscript. "Related" means any relation with for-profit or not-for-profit third parties whose interests may be affected by the content of the manuscript. Disclosure represents a commitment to transparency and does not necessarily indicate a bias. If you are in doubt about whether to list a relationship/activity/interest, it is preferable that you do so.

The author's relationships/activities/interests should be defined broadly. For example, if your manuscript pertains to the epidemiology of hypertension, you should declare all relationships with manufacturers of antihypertensive medication, even if that medication is not mentioned in the manuscript.

In item #1 below, report all support for the work reported in this manuscript without time limit. For all other items, the time frame for disclosure is the past 36 months.

|                                                    |                                                                                                                                                                                | Name all entities with whom you have this relationship or indicate none (add rows as needed)                                                                                                                                                                                                                                                                                      | Specifications/Comments (e.g., if payments were made to you or to your institution) |  |  |  |                                           |  |  |
|----------------------------------------------------|--------------------------------------------------------------------------------------------------------------------------------------------------------------------------------|-----------------------------------------------------------------------------------------------------------------------------------------------------------------------------------------------------------------------------------------------------------------------------------------------------------------------------------------------------------------------------------|-------------------------------------------------------------------------------------|--|--|--|-------------------------------------------|--|--|
| Time frame: Since the initial planning of the work |                                                                                                                                                                                |                                                                                                                                                                                                                                                                                                                                                                                   |                                                                                     |  |  |  |                                           |  |  |
| <b>1</b>                                           | All support for the present manuscript (e.g., funding, provision of study materials, medical writing, article processing charges, etc.)<br><b>No time limit for this item.</b> | <input type="checkbox"/> <b>None</b><br><br><table border="1" style="width: 100%; border-collapse: collapse;"> <tr> <td style="width: 60%;">P30 CA015704-47 (NIH, National Cancer Institute)</td> <td></td> </tr> <tr> <td> </td> <td></td> </tr> <tr> <td colspan="2" style="text-align: right; font-size: small;">Click the tab key to add additional rows.</td> </tr> </table> | P30 CA015704-47 (NIH, National Cancer Institute)                                    |  |  |  | Click the tab key to add additional rows. |  |  |
| P30 CA015704-47 (NIH, National Cancer Institute)   |                                                                                                                                                                                |                                                                                                                                                                                                                                                                                                                                                                                   |                                                                                     |  |  |  |                                           |  |  |
|                                                    |                                                                                                                                                                                |                                                                                                                                                                                                                                                                                                                                                                                   |                                                                                     |  |  |  |                                           |  |  |
| Click the tab key to add additional rows.          |                                                                                                                                                                                |                                                                                                                                                                                                                                                                                                                                                                                   |                                                                                     |  |  |  |                                           |  |  |
| Time frame: past 36 months                         |                                                                                                                                                                                |                                                                                                                                                                                                                                                                                                                                                                                   |                                                                                     |  |  |  |                                           |  |  |
| <b>2</b>                                           | Grants or contracts from any entity (if not indicated in item #1 above).                                                                                                       | <input checked="" type="checkbox"/> <b>None</b><br><br><table border="1" style="width: 100%; border-collapse: collapse;"> <tr> <td style="width: 60%;"> </td> <td></td> </tr> <tr> <td> </td> <td></td> </tr> <tr> <td> </td> <td></td> </tr> </table>                                                                                                                            |                                                                                     |  |  |  |                                           |  |  |
|                                                    |                                                                                                                                                                                |                                                                                                                                                                                                                                                                                                                                                                                   |                                                                                     |  |  |  |                                           |  |  |
|                                                    |                                                                                                                                                                                |                                                                                                                                                                                                                                                                                                                                                                                   |                                                                                     |  |  |  |                                           |  |  |
|                                                    |                                                                                                                                                                                |                                                                                                                                                                                                                                                                                                                                                                                   |                                                                                     |  |  |  |                                           |  |  |
| <b>3</b>                                           | Royalties or licenses                                                                                                                                                          | <input checked="" type="checkbox"/> <b>None</b><br><br><table border="1" style="width: 100%; border-collapse: collapse;"> <tr> <td style="width: 60%;"> </td> <td></td> </tr> <tr> <td> </td> <td></td> </tr> <tr> <td> </td> <td></td> </tr> </table>                                                                                                                            |                                                                                     |  |  |  |                                           |  |  |
|                                                    |                                                                                                                                                                                |                                                                                                                                                                                                                                                                                                                                                                                   |                                                                                     |  |  |  |                                           |  |  |
|                                                    |                                                                                                                                                                                |                                                                                                                                                                                                                                                                                                                                                                                   |                                                                                     |  |  |  |                                           |  |  |
|                                                    |                                                                                                                                                                                |                                                                                                                                                                                                                                                                                                                                                                                   |                                                                                     |  |  |  |                                           |  |  |

|    |                                                                                                              | Name all entities with whom you have this relationship or indicate none (add rows as needed)                                                                                                                                                                                                                                                                           | Specifications/Comments (e.g., if payments were made to you or to your institution) |  |  |  |  |  |  |  |  |
|----|--------------------------------------------------------------------------------------------------------------|------------------------------------------------------------------------------------------------------------------------------------------------------------------------------------------------------------------------------------------------------------------------------------------------------------------------------------------------------------------------|-------------------------------------------------------------------------------------|--|--|--|--|--|--|--|--|
| 4  | Consulting fees                                                                                              | <input checked="" type="checkbox"/> <b>None</b><br><table border="1" style="width: 100%; border-collapse: collapse;"> <tr><td style="width: 50%; height: 15px;"></td><td style="width: 50%;"></td></tr> <tr><td style="height: 15px;"></td><td></td></tr> <tr><td style="height: 15px;"></td><td></td></tr> <tr><td style="height: 15px;"></td><td></td></tr> </table> |                                                                                     |  |  |  |  |  |  |  |  |
|    |                                                                                                              |                                                                                                                                                                                                                                                                                                                                                                        |                                                                                     |  |  |  |  |  |  |  |  |
|    |                                                                                                              |                                                                                                                                                                                                                                                                                                                                                                        |                                                                                     |  |  |  |  |  |  |  |  |
|    |                                                                                                              |                                                                                                                                                                                                                                                                                                                                                                        |                                                                                     |  |  |  |  |  |  |  |  |
|    |                                                                                                              |                                                                                                                                                                                                                                                                                                                                                                        |                                                                                     |  |  |  |  |  |  |  |  |
| 5  | Payment or honoraria for lectures, presentations, speakers bureaus, manuscript writing or educational events | <input checked="" type="checkbox"/> <b>None</b><br><table border="1" style="width: 100%; border-collapse: collapse;"> <tr><td style="width: 50%; height: 15px;"></td><td style="width: 50%;"></td></tr> <tr><td style="height: 15px;"></td><td></td></tr> <tr><td style="height: 15px;"></td><td></td></tr> </table>                                                   |                                                                                     |  |  |  |  |  |  |  |  |
|    |                                                                                                              |                                                                                                                                                                                                                                                                                                                                                                        |                                                                                     |  |  |  |  |  |  |  |  |
|    |                                                                                                              |                                                                                                                                                                                                                                                                                                                                                                        |                                                                                     |  |  |  |  |  |  |  |  |
|    |                                                                                                              |                                                                                                                                                                                                                                                                                                                                                                        |                                                                                     |  |  |  |  |  |  |  |  |
| 6  | Payment for expert testimony                                                                                 | <input checked="" type="checkbox"/> <b>None</b><br><table border="1" style="width: 100%; border-collapse: collapse;"> <tr><td style="width: 50%; height: 15px;"></td><td style="width: 50%;"></td></tr> <tr><td style="height: 15px;"></td><td></td></tr> <tr><td style="height: 15px;"></td><td></td></tr> </table>                                                   |                                                                                     |  |  |  |  |  |  |  |  |
|    |                                                                                                              |                                                                                                                                                                                                                                                                                                                                                                        |                                                                                     |  |  |  |  |  |  |  |  |
|    |                                                                                                              |                                                                                                                                                                                                                                                                                                                                                                        |                                                                                     |  |  |  |  |  |  |  |  |
|    |                                                                                                              |                                                                                                                                                                                                                                                                                                                                                                        |                                                                                     |  |  |  |  |  |  |  |  |
| 7  | Support for attending meetings and/or travel                                                                 | <input checked="" type="checkbox"/> <b>None</b><br><table border="1" style="width: 100%; border-collapse: collapse;"> <tr><td style="width: 50%; height: 15px;"></td><td style="width: 50%;"></td></tr> <tr><td style="height: 15px;"></td><td></td></tr> <tr><td style="height: 15px;"></td><td></td></tr> </table>                                                   |                                                                                     |  |  |  |  |  |  |  |  |
|    |                                                                                                              |                                                                                                                                                                                                                                                                                                                                                                        |                                                                                     |  |  |  |  |  |  |  |  |
|    |                                                                                                              |                                                                                                                                                                                                                                                                                                                                                                        |                                                                                     |  |  |  |  |  |  |  |  |
|    |                                                                                                              |                                                                                                                                                                                                                                                                                                                                                                        |                                                                                     |  |  |  |  |  |  |  |  |
| 8  | Patents planned, issued or pending                                                                           | <input checked="" type="checkbox"/> <b>None</b><br><table border="1" style="width: 100%; border-collapse: collapse;"> <tr><td style="width: 50%; height: 15px;"></td><td style="width: 50%;"></td></tr> <tr><td style="height: 15px;"></td><td></td></tr> <tr><td style="height: 15px;"></td><td></td></tr> </table>                                                   |                                                                                     |  |  |  |  |  |  |  |  |
|    |                                                                                                              |                                                                                                                                                                                                                                                                                                                                                                        |                                                                                     |  |  |  |  |  |  |  |  |
|    |                                                                                                              |                                                                                                                                                                                                                                                                                                                                                                        |                                                                                     |  |  |  |  |  |  |  |  |
|    |                                                                                                              |                                                                                                                                                                                                                                                                                                                                                                        |                                                                                     |  |  |  |  |  |  |  |  |
| 9  | Participation on a Data Safety Monitoring Board or Advisory Board                                            | <input checked="" type="checkbox"/> <b>None</b><br><table border="1" style="width: 100%; border-collapse: collapse;"> <tr><td style="width: 50%; height: 15px;"></td><td style="width: 50%;"></td></tr> <tr><td style="height: 15px;"></td><td></td></tr> <tr><td style="height: 15px;"></td><td></td></tr> </table>                                                   |                                                                                     |  |  |  |  |  |  |  |  |
|    |                                                                                                              |                                                                                                                                                                                                                                                                                                                                                                        |                                                                                     |  |  |  |  |  |  |  |  |
|    |                                                                                                              |                                                                                                                                                                                                                                                                                                                                                                        |                                                                                     |  |  |  |  |  |  |  |  |
|    |                                                                                                              |                                                                                                                                                                                                                                                                                                                                                                        |                                                                                     |  |  |  |  |  |  |  |  |
| 10 | Leadership or fiduciary role in other board, society, committee or advocacy group, paid or unpaid            | <input checked="" type="checkbox"/> <b>None</b><br><table border="1" style="width: 100%; border-collapse: collapse;"> <tr><td style="width: 50%; height: 15px;"></td><td style="width: 50%;"></td></tr> <tr><td style="height: 15px;"></td><td></td></tr> <tr><td style="height: 15px;"></td><td></td></tr> </table>                                                   |                                                                                     |  |  |  |  |  |  |  |  |
|    |                                                                                                              |                                                                                                                                                                                                                                                                                                                                                                        |                                                                                     |  |  |  |  |  |  |  |  |
|    |                                                                                                              |                                                                                                                                                                                                                                                                                                                                                                        |                                                                                     |  |  |  |  |  |  |  |  |
|    |                                                                                                              |                                                                                                                                                                                                                                                                                                                                                                        |                                                                                     |  |  |  |  |  |  |  |  |

|           |                                                                                  | Name all entities with whom you have this relationship or indicate none (add rows as needed) | Specifications/Comments (e.g., if payments were made to you or to your institution) |
|-----------|----------------------------------------------------------------------------------|----------------------------------------------------------------------------------------------|-------------------------------------------------------------------------------------|
| <b>11</b> | Stock or stock options                                                           | <input checked="" type="checkbox"/> <b>None</b>                                              |                                                                                     |
|           |                                                                                  |                                                                                              |                                                                                     |
|           |                                                                                  |                                                                                              |                                                                                     |
| <b>12</b> | Receipt of equipment, materials, drugs, medical writing, gifts or other services | <input checked="" type="checkbox"/> <b>None</b>                                              |                                                                                     |
|           |                                                                                  |                                                                                              |                                                                                     |
|           |                                                                                  |                                                                                              |                                                                                     |
| <b>13</b> | Other financial or non-financial interests                                       | <input checked="" type="checkbox"/> <b>None</b>                                              |                                                                                     |
|           |                                                                                  |                                                                                              |                                                                                     |
|           |                                                                                  |                                                                                              |                                                                                     |

Please place an "X" next to the following statement to indicate your agreement:

I certify that I have answered every question and have not altered the wording of any of the questions on this form.

## ICMJE DISCLOSURE FORM

**Date:** 4/19/2023

**Your Name:** Sophie Paczesny

**Manuscript Title:** Discovery and Validation of Graft-specific Biomarkers for Risk of Chronic Graft-Versus-Host Disease and Mortality

**Manuscript Number (if known):** 168575-JCI-CMED-1

In the interest of transparency, we ask you to disclose all relationships/activities/interests listed below that are related to the content of your manuscript. "Related" means any relation with for-profit or not-for-profit third parties whose interests may be affected by the content of the manuscript. Disclosure represents a commitment to transparency and does not necessarily indicate a bias. If you are in doubt about whether to list a relationship/activity/interest, it is preferable that you do so.

The author's relationships/activities/interests should be defined broadly. For example, if your manuscript pertains to the epidemiology of hypertension, you should declare all relationships with manufacturers of antihypertensive medication, even if that medication is not mentioned in the manuscript.

In item #1 below, report all support for the work reported in this manuscript without time limit. For all other items, the time frame for disclosure is the past 36 months.

|                                                    | Name all entities with whom you have this relationship or indicate none (add rows as needed)                                                                                   | Specifications/Comments (e.g., if payments were made to you or to your institution)                                                                                                                                                                                                                                                                       |  |  |  |  |  |  |
|----------------------------------------------------|--------------------------------------------------------------------------------------------------------------------------------------------------------------------------------|-----------------------------------------------------------------------------------------------------------------------------------------------------------------------------------------------------------------------------------------------------------------------------------------------------------------------------------------------------------|--|--|--|--|--|--|
| Time frame: Since the initial planning of the work |                                                                                                                                                                                |                                                                                                                                                                                                                                                                                                                                                           |  |  |  |  |  |  |
| <b>1</b>                                           | All support for the present manuscript (e.g., funding, provision of study materials, medical writing, article processing charges, etc.)<br><b>No time limit for this item.</b> | <input checked="" type="checkbox"/> <b>None</b><br><table border="1" style="width: 100%; height: 40px; margin-top: 5px;"> <tr><td style="width: 60%;"></td><td></td></tr> <tr><td></td><td></td></tr> <tr><td></td><td></td></tr> </table> <p style="font-size: small; text-align: right; margin-top: 5px;">Click the tab key to add additional rows.</p> |  |  |  |  |  |  |
|                                                    |                                                                                                                                                                                |                                                                                                                                                                                                                                                                                                                                                           |  |  |  |  |  |  |
|                                                    |                                                                                                                                                                                |                                                                                                                                                                                                                                                                                                                                                           |  |  |  |  |  |  |
|                                                    |                                                                                                                                                                                |                                                                                                                                                                                                                                                                                                                                                           |  |  |  |  |  |  |
| Time frame: past 36 months                         |                                                                                                                                                                                |                                                                                                                                                                                                                                                                                                                                                           |  |  |  |  |  |  |
| <b>2</b>                                           | Grants or contracts from any entity (if not indicated in item #1 above).                                                                                                       | <input checked="" type="checkbox"/> <b>None</b><br><table border="1" style="width: 100%; height: 40px; margin-top: 5px;"> <tr><td style="width: 60%;"></td><td></td></tr> <tr><td></td><td></td></tr> <tr><td></td><td></td></tr> </table>                                                                                                                |  |  |  |  |  |  |
|                                                    |                                                                                                                                                                                |                                                                                                                                                                                                                                                                                                                                                           |  |  |  |  |  |  |
|                                                    |                                                                                                                                                                                |                                                                                                                                                                                                                                                                                                                                                           |  |  |  |  |  |  |
|                                                    |                                                                                                                                                                                |                                                                                                                                                                                                                                                                                                                                                           |  |  |  |  |  |  |
| <b>3</b>                                           | Royalties or licenses                                                                                                                                                          | <input checked="" type="checkbox"/> <b>None</b><br><table border="1" style="width: 100%; height: 40px; margin-top: 5px;"> <tr><td style="width: 60%;"></td><td></td></tr> <tr><td></td><td></td></tr> <tr><td></td><td></td></tr> </table>                                                                                                                |  |  |  |  |  |  |
|                                                    |                                                                                                                                                                                |                                                                                                                                                                                                                                                                                                                                                           |  |  |  |  |  |  |
|                                                    |                                                                                                                                                                                |                                                                                                                                                                                                                                                                                                                                                           |  |  |  |  |  |  |
|                                                    |                                                                                                                                                                                |                                                                                                                                                                                                                                                                                                                                                           |  |  |  |  |  |  |

|    |                                                                                                              | Name all entities with whom you have this relationship or indicate none (add rows as needed)                            | Specifications/Comments (e.g., if payments were made to you or to your institution) |
|----|--------------------------------------------------------------------------------------------------------------|-------------------------------------------------------------------------------------------------------------------------|-------------------------------------------------------------------------------------|
| 4  | Consulting fees                                                                                              | <input checked="" type="checkbox"/> None                                                                                |                                                                                     |
|    |                                                                                                              |                                                                                                                         |                                                                                     |
|    |                                                                                                              |                                                                                                                         |                                                                                     |
|    |                                                                                                              |                                                                                                                         |                                                                                     |
| 5  | Payment or honoraria for lectures, presentations, speakers bureaus, manuscript writing or educational events | <input checked="" type="checkbox"/> None                                                                                |                                                                                     |
|    |                                                                                                              |                                                                                                                         |                                                                                     |
|    |                                                                                                              |                                                                                                                         |                                                                                     |
|    |                                                                                                              |                                                                                                                         |                                                                                     |
| 6  | Payment for expert testimony                                                                                 | <input checked="" type="checkbox"/> None                                                                                |                                                                                     |
|    |                                                                                                              |                                                                                                                         |                                                                                     |
|    |                                                                                                              |                                                                                                                         |                                                                                     |
|    |                                                                                                              |                                                                                                                         |                                                                                     |
| 7  | Support for attending meetings and/or travel                                                                 | <input checked="" type="checkbox"/> None                                                                                |                                                                                     |
|    |                                                                                                              |                                                                                                                         |                                                                                     |
|    |                                                                                                              |                                                                                                                         |                                                                                     |
|    |                                                                                                              |                                                                                                                         |                                                                                     |
| 8  | Patents planned, issued or pending                                                                           | <input type="checkbox"/> None                                                                                           |                                                                                     |
|    |                                                                                                              | S.P. holds a patent on "Biomarkers and assays to detect chronic graft versus host disease" (U.S. Patent #10,571,478 B2) |                                                                                     |
|    |                                                                                                              |                                                                                                                         |                                                                                     |
|    |                                                                                                              |                                                                                                                         |                                                                                     |
| 9  | Participation on a Data Safety Monitoring Board or Advisory Board                                            | <input checked="" type="checkbox"/> None                                                                                |                                                                                     |
|    |                                                                                                              |                                                                                                                         |                                                                                     |
|    |                                                                                                              |                                                                                                                         |                                                                                     |
|    |                                                                                                              |                                                                                                                         |                                                                                     |
| 10 | Leadership or fiduciary role in other board, society, committee or advocacy group, paid or unpaid            | <input checked="" type="checkbox"/> None                                                                                |                                                                                     |
|    |                                                                                                              |                                                                                                                         |                                                                                     |
|    |                                                                                                              |                                                                                                                         |                                                                                     |
|    |                                                                                                              |                                                                                                                         |                                                                                     |

|           |                                                                                  | Name all entities with whom you have this relationship or indicate none (add rows as needed) | Specifications/Comments (e.g., if payments were made to you or to your institution) |
|-----------|----------------------------------------------------------------------------------|----------------------------------------------------------------------------------------------|-------------------------------------------------------------------------------------|
| <b>11</b> | Stock or stock options                                                           | <input checked="" type="checkbox"/> <b>None</b>                                              |                                                                                     |
|           |                                                                                  |                                                                                              |                                                                                     |
|           |                                                                                  |                                                                                              |                                                                                     |
| <b>12</b> | Receipt of equipment, materials, drugs, medical writing, gifts or other services | <input checked="" type="checkbox"/> <b>None</b>                                              |                                                                                     |
|           |                                                                                  |                                                                                              |                                                                                     |
|           |                                                                                  |                                                                                              |                                                                                     |
| <b>13</b> | Other financial or non-financial interests                                       | <input checked="" type="checkbox"/> <b>None</b>                                              |                                                                                     |
|           |                                                                                  |                                                                                              |                                                                                     |
|           |                                                                                  |                                                                                              |                                                                                     |

Please place an "X" next to the following statement to indicate your agreement:

I certify that I have answered every question and have not altered the wording of any of the questions on this form.

## ICMJE DISCLOSURE FORM

**Date:** 01032023

**Your Name:** Djamilatou Adom

**Manuscript Title:** Discovery and Validation of Graft-specific Biomarkers for Risk of Chronic Graft-Versus-Host Disease and Mortality

**Manuscript Number (if known):** 168575-JCI-CMED-1

In the interest of transparency, we ask you to disclose all relationships/activities/interests listed below that are related to the content of your manuscript. "Related" means any relation with for-profit or not-for-profit third parties whose interests may be affected by the content of the manuscript. Disclosure represents a commitment to transparency and does not necessarily indicate a bias. If you are in doubt about whether to list a relationship/activity/interest, it is preferable that you do so.

The author's relationships/activities/interests should be defined broadly. For example, if your manuscript pertains to the epidemiology of hypertension, you should declare all relationships with manufacturers of antihypertensive medication, even if that medication is not mentioned in the manuscript.

In item #1 below, report all support for the work reported in this manuscript without time limit. For all other items, the time frame for disclosure is the past 36 months.

|                                                           |                                                                                                                                                                                | Name all entities with whom you have this relationship or indicate none (add rows as needed)                                                                                                                                               | Specifications/Comments (e.g., if payments were made to you or to your institution) |  |  |  |  |  |                                                                                                                                           |
|-----------------------------------------------------------|--------------------------------------------------------------------------------------------------------------------------------------------------------------------------------|--------------------------------------------------------------------------------------------------------------------------------------------------------------------------------------------------------------------------------------------|-------------------------------------------------------------------------------------|--|--|--|--|--|-------------------------------------------------------------------------------------------------------------------------------------------|
| <b>Time frame: Since the initial planning of the work</b> |                                                                                                                                                                                |                                                                                                                                                                                                                                            |                                                                                     |  |  |  |  |  |                                                                                                                                           |
| <b>1</b>                                                  | All support for the present manuscript (e.g., funding, provision of study materials, medical writing, article processing charges, etc.)<br><b>No time limit for this item.</b> | <input checked="" type="checkbox"/> <b>None</b><br><table border="1" style="width: 100%; height: 40px; margin-top: 5px;"> <tr><td style="width: 60%;"></td><td></td></tr> <tr><td></td><td></td></tr> <tr><td></td><td></td></tr> </table> |                                                                                     |  |  |  |  |  | <div style="border: 1px solid black; padding: 2px; font-size: small; text-align: center;">Click the tab key to add additional rows.</div> |
|                                                           |                                                                                                                                                                                |                                                                                                                                                                                                                                            |                                                                                     |  |  |  |  |  |                                                                                                                                           |
|                                                           |                                                                                                                                                                                |                                                                                                                                                                                                                                            |                                                                                     |  |  |  |  |  |                                                                                                                                           |
|                                                           |                                                                                                                                                                                |                                                                                                                                                                                                                                            |                                                                                     |  |  |  |  |  |                                                                                                                                           |
| <b>Time frame: past 36 months</b>                         |                                                                                                                                                                                |                                                                                                                                                                                                                                            |                                                                                     |  |  |  |  |  |                                                                                                                                           |
| <b>2</b>                                                  | Grants or contracts from any entity (if not indicated in item #1 above).                                                                                                       | <input checked="" type="checkbox"/> <b>None</b><br><table border="1" style="width: 100%; height: 40px; margin-top: 5px;"> <tr><td style="width: 60%;"></td><td></td></tr> <tr><td></td><td></td></tr> <tr><td></td><td></td></tr> </table> |                                                                                     |  |  |  |  |  |                                                                                                                                           |
|                                                           |                                                                                                                                                                                |                                                                                                                                                                                                                                            |                                                                                     |  |  |  |  |  |                                                                                                                                           |
|                                                           |                                                                                                                                                                                |                                                                                                                                                                                                                                            |                                                                                     |  |  |  |  |  |                                                                                                                                           |
|                                                           |                                                                                                                                                                                |                                                                                                                                                                                                                                            |                                                                                     |  |  |  |  |  |                                                                                                                                           |
| <b>3</b>                                                  | Royalties or licenses                                                                                                                                                          | <input checked="" type="checkbox"/> <b>None</b><br><table border="1" style="width: 100%; height: 40px; margin-top: 5px;"> <tr><td style="width: 60%;"></td><td></td></tr> <tr><td></td><td></td></tr> <tr><td></td><td></td></tr> </table> |                                                                                     |  |  |  |  |  |                                                                                                                                           |
|                                                           |                                                                                                                                                                                |                                                                                                                                                                                                                                            |                                                                                     |  |  |  |  |  |                                                                                                                                           |
|                                                           |                                                                                                                                                                                |                                                                                                                                                                                                                                            |                                                                                     |  |  |  |  |  |                                                                                                                                           |
|                                                           |                                                                                                                                                                                |                                                                                                                                                                                                                                            |                                                                                     |  |  |  |  |  |                                                                                                                                           |

|    |                                                                                                              | Name all entities with whom you have this relationship or indicate none (add rows as needed)                                                                                                                                                                                                                                                                           | Specifications/Comments (e.g., if payments were made to you or to your institution) |  |  |  |  |  |  |  |  |
|----|--------------------------------------------------------------------------------------------------------------|------------------------------------------------------------------------------------------------------------------------------------------------------------------------------------------------------------------------------------------------------------------------------------------------------------------------------------------------------------------------|-------------------------------------------------------------------------------------|--|--|--|--|--|--|--|--|
| 4  | Consulting fees                                                                                              | <input checked="" type="checkbox"/> <b>None</b><br><table border="1" style="width: 100%; border-collapse: collapse;"> <tr><td style="width: 50%; height: 15px;"></td><td style="width: 50%;"></td></tr> <tr><td style="height: 15px;"></td><td></td></tr> <tr><td style="height: 15px;"></td><td></td></tr> <tr><td style="height: 15px;"></td><td></td></tr> </table> |                                                                                     |  |  |  |  |  |  |  |  |
|    |                                                                                                              |                                                                                                                                                                                                                                                                                                                                                                        |                                                                                     |  |  |  |  |  |  |  |  |
|    |                                                                                                              |                                                                                                                                                                                                                                                                                                                                                                        |                                                                                     |  |  |  |  |  |  |  |  |
|    |                                                                                                              |                                                                                                                                                                                                                                                                                                                                                                        |                                                                                     |  |  |  |  |  |  |  |  |
|    |                                                                                                              |                                                                                                                                                                                                                                                                                                                                                                        |                                                                                     |  |  |  |  |  |  |  |  |
| 5  | Payment or honoraria for lectures, presentations, speakers bureaus, manuscript writing or educational events | <input checked="" type="checkbox"/> <b>None</b><br><table border="1" style="width: 100%; border-collapse: collapse;"> <tr><td style="width: 50%; height: 15px;"></td><td style="width: 50%;"></td></tr> <tr><td style="height: 15px;"></td><td></td></tr> <tr><td style="height: 15px;"></td><td></td></tr> </table>                                                   |                                                                                     |  |  |  |  |  |  |  |  |
|    |                                                                                                              |                                                                                                                                                                                                                                                                                                                                                                        |                                                                                     |  |  |  |  |  |  |  |  |
|    |                                                                                                              |                                                                                                                                                                                                                                                                                                                                                                        |                                                                                     |  |  |  |  |  |  |  |  |
|    |                                                                                                              |                                                                                                                                                                                                                                                                                                                                                                        |                                                                                     |  |  |  |  |  |  |  |  |
| 6  | Payment for expert testimony                                                                                 | <input checked="" type="checkbox"/> <b>None</b><br><table border="1" style="width: 100%; border-collapse: collapse;"> <tr><td style="width: 50%; height: 15px;"></td><td style="width: 50%;"></td></tr> <tr><td style="height: 15px;"></td><td></td></tr> <tr><td style="height: 15px;"></td><td></td></tr> </table>                                                   |                                                                                     |  |  |  |  |  |  |  |  |
|    |                                                                                                              |                                                                                                                                                                                                                                                                                                                                                                        |                                                                                     |  |  |  |  |  |  |  |  |
|    |                                                                                                              |                                                                                                                                                                                                                                                                                                                                                                        |                                                                                     |  |  |  |  |  |  |  |  |
|    |                                                                                                              |                                                                                                                                                                                                                                                                                                                                                                        |                                                                                     |  |  |  |  |  |  |  |  |
| 7  | Support for attending meetings and/or travel                                                                 | <input checked="" type="checkbox"/> <b>None</b><br><table border="1" style="width: 100%; border-collapse: collapse;"> <tr><td style="width: 50%; height: 15px;"></td><td style="width: 50%;"></td></tr> <tr><td style="height: 15px;"></td><td></td></tr> <tr><td style="height: 15px;"></td><td></td></tr> </table>                                                   |                                                                                     |  |  |  |  |  |  |  |  |
|    |                                                                                                              |                                                                                                                                                                                                                                                                                                                                                                        |                                                                                     |  |  |  |  |  |  |  |  |
|    |                                                                                                              |                                                                                                                                                                                                                                                                                                                                                                        |                                                                                     |  |  |  |  |  |  |  |  |
|    |                                                                                                              |                                                                                                                                                                                                                                                                                                                                                                        |                                                                                     |  |  |  |  |  |  |  |  |
| 8  | Patents planned, issued or pending                                                                           | <input checked="" type="checkbox"/> <b>None</b><br><table border="1" style="width: 100%; border-collapse: collapse;"> <tr><td style="width: 50%; height: 15px;"></td><td style="width: 50%;"></td></tr> <tr><td style="height: 15px;"></td><td></td></tr> <tr><td style="height: 15px;"></td><td></td></tr> </table>                                                   |                                                                                     |  |  |  |  |  |  |  |  |
|    |                                                                                                              |                                                                                                                                                                                                                                                                                                                                                                        |                                                                                     |  |  |  |  |  |  |  |  |
|    |                                                                                                              |                                                                                                                                                                                                                                                                                                                                                                        |                                                                                     |  |  |  |  |  |  |  |  |
|    |                                                                                                              |                                                                                                                                                                                                                                                                                                                                                                        |                                                                                     |  |  |  |  |  |  |  |  |
| 9  | Participation on a Data Safety Monitoring Board or Advisory Board                                            | <input checked="" type="checkbox"/> <b>None</b><br><table border="1" style="width: 100%; border-collapse: collapse;"> <tr><td style="width: 50%; height: 15px;"></td><td style="width: 50%;"></td></tr> <tr><td style="height: 15px;"></td><td></td></tr> <tr><td style="height: 15px;"></td><td></td></tr> </table>                                                   |                                                                                     |  |  |  |  |  |  |  |  |
|    |                                                                                                              |                                                                                                                                                                                                                                                                                                                                                                        |                                                                                     |  |  |  |  |  |  |  |  |
|    |                                                                                                              |                                                                                                                                                                                                                                                                                                                                                                        |                                                                                     |  |  |  |  |  |  |  |  |
|    |                                                                                                              |                                                                                                                                                                                                                                                                                                                                                                        |                                                                                     |  |  |  |  |  |  |  |  |
| 10 | Leadership or fiduciary role in other board, society, committee or advocacy group, paid or unpaid            | <input checked="" type="checkbox"/> <b>None</b><br><table border="1" style="width: 100%; border-collapse: collapse;"> <tr><td style="width: 50%; height: 15px;"></td><td style="width: 50%;"></td></tr> <tr><td style="height: 15px;"></td><td></td></tr> <tr><td style="height: 15px;"></td><td></td></tr> </table>                                                   |                                                                                     |  |  |  |  |  |  |  |  |
|    |                                                                                                              |                                                                                                                                                                                                                                                                                                                                                                        |                                                                                     |  |  |  |  |  |  |  |  |
|    |                                                                                                              |                                                                                                                                                                                                                                                                                                                                                                        |                                                                                     |  |  |  |  |  |  |  |  |
|    |                                                                                                              |                                                                                                                                                                                                                                                                                                                                                                        |                                                                                     |  |  |  |  |  |  |  |  |

|           |                                                                                  | Name all entities with whom you have this relationship or indicate none (add rows as needed)                                                                                                                                                                                                                         | Specifications/Comments (e.g., if payments were made to you or to your institution) |  |  |  |  |  |  |
|-----------|----------------------------------------------------------------------------------|----------------------------------------------------------------------------------------------------------------------------------------------------------------------------------------------------------------------------------------------------------------------------------------------------------------------|-------------------------------------------------------------------------------------|--|--|--|--|--|--|
| <b>11</b> | Stock or stock options                                                           | <input checked="" type="checkbox"/> <b>None</b><br><table border="1" style="width: 100%; border-collapse: collapse;"> <tr><td style="width: 50%; height: 15px;"></td><td style="width: 50%;"></td></tr> <tr><td style="height: 15px;"></td><td></td></tr> <tr><td style="height: 15px;"></td><td></td></tr> </table> |                                                                                     |  |  |  |  |  |  |
|           |                                                                                  |                                                                                                                                                                                                                                                                                                                      |                                                                                     |  |  |  |  |  |  |
|           |                                                                                  |                                                                                                                                                                                                                                                                                                                      |                                                                                     |  |  |  |  |  |  |
|           |                                                                                  |                                                                                                                                                                                                                                                                                                                      |                                                                                     |  |  |  |  |  |  |
| <b>12</b> | Receipt of equipment, materials, drugs, medical writing, gifts or other services | <input checked="" type="checkbox"/> <b>None</b><br><table border="1" style="width: 100%; border-collapse: collapse;"> <tr><td style="width: 50%; height: 15px;"></td><td style="width: 50%;"></td></tr> <tr><td style="height: 15px;"></td><td></td></tr> <tr><td style="height: 15px;"></td><td></td></tr> </table> |                                                                                     |  |  |  |  |  |  |
|           |                                                                                  |                                                                                                                                                                                                                                                                                                                      |                                                                                     |  |  |  |  |  |  |
|           |                                                                                  |                                                                                                                                                                                                                                                                                                                      |                                                                                     |  |  |  |  |  |  |
|           |                                                                                  |                                                                                                                                                                                                                                                                                                                      |                                                                                     |  |  |  |  |  |  |
| <b>13</b> | Other financial or non-financial interests                                       | <input checked="" type="checkbox"/> <b>None</b><br><table border="1" style="width: 100%; border-collapse: collapse;"> <tr><td style="width: 50%; height: 15px;"></td><td style="width: 50%;"></td></tr> <tr><td style="height: 15px;"></td><td></td></tr> <tr><td style="height: 15px;"></td><td></td></tr> </table> |                                                                                     |  |  |  |  |  |  |
|           |                                                                                  |                                                                                                                                                                                                                                                                                                                      |                                                                                     |  |  |  |  |  |  |
|           |                                                                                  |                                                                                                                                                                                                                                                                                                                      |                                                                                     |  |  |  |  |  |  |
|           |                                                                                  |                                                                                                                                                                                                                                                                                                                      |                                                                                     |  |  |  |  |  |  |

**Please place an "X" next to the following statement to indicate your agreement:**

I certify that I have answered every question and have not altered the wording of any of the questions on this form.

## ICMJE DISCLOSURE FORM

**Date:** 01032023

**Your Name:** Mingwei Fei

**Manuscript Title:** Discovery and Validation of Graft-specific Biomarkers for Risk of Chronic Graft-Versus-Host Disease and Mortality

**Manuscript Number (if known):** 168575-JCI-CMED-1

In the interest of transparency, we ask you to disclose all relationships/activities/interests listed below that are related to the content of your manuscript. "Related" means any relation with for-profit or not-for-profit third parties whose interests may be affected by the content of the manuscript. Disclosure represents a commitment to transparency and does not necessarily indicate a bias. If you are in doubt about whether to list a relationship/activity/interest, it is preferable that you do so.

The author's relationships/activities/interests should be defined broadly. For example, if your manuscript pertains to the epidemiology of hypertension, you should declare all relationships with manufacturers of antihypertensive medication, even if that medication is not mentioned in the manuscript.

In item #1 below, report all support for the work reported in this manuscript without time limit. For all other items, the time frame for disclosure is the past 36 months.

|                                                           |                                                                                                                                                                                | Name all entities with whom you have this relationship or indicate none (add rows as needed)                                                                                                                                               | Specifications/Comments (e.g., if payments were made to you or to your institution) |  |  |  |  |  |                                                                                                                                                                                                                                                                                                  |  |  |  |  |  |  |
|-----------------------------------------------------------|--------------------------------------------------------------------------------------------------------------------------------------------------------------------------------|--------------------------------------------------------------------------------------------------------------------------------------------------------------------------------------------------------------------------------------------|-------------------------------------------------------------------------------------|--|--|--|--|--|--------------------------------------------------------------------------------------------------------------------------------------------------------------------------------------------------------------------------------------------------------------------------------------------------|--|--|--|--|--|--|
| <b>Time frame: Since the initial planning of the work</b> |                                                                                                                                                                                |                                                                                                                                                                                                                                            |                                                                                     |  |  |  |  |  |                                                                                                                                                                                                                                                                                                  |  |  |  |  |  |  |
| <b>1</b>                                                  | All support for the present manuscript (e.g., funding, provision of study materials, medical writing, article processing charges, etc.)<br><b>No time limit for this item.</b> | <input checked="" type="checkbox"/> <b>None</b><br><table border="1" style="width: 100%; height: 40px; margin-top: 5px;"> <tr><td style="width: 60%;"></td><td></td></tr> <tr><td></td><td></td></tr> <tr><td></td><td></td></tr> </table> |                                                                                     |  |  |  |  |  | <table border="1" style="width: 100%; height: 40px; margin-top: 5px;"> <tr><td style="width: 60%;"></td><td></td></tr> <tr><td></td><td></td></tr> <tr><td></td><td></td></tr> </table> <p style="font-size: small; color: gray; margin-top: 5px;">Click the tab key to add additional rows.</p> |  |  |  |  |  |  |
|                                                           |                                                                                                                                                                                |                                                                                                                                                                                                                                            |                                                                                     |  |  |  |  |  |                                                                                                                                                                                                                                                                                                  |  |  |  |  |  |  |
|                                                           |                                                                                                                                                                                |                                                                                                                                                                                                                                            |                                                                                     |  |  |  |  |  |                                                                                                                                                                                                                                                                                                  |  |  |  |  |  |  |
|                                                           |                                                                                                                                                                                |                                                                                                                                                                                                                                            |                                                                                     |  |  |  |  |  |                                                                                                                                                                                                                                                                                                  |  |  |  |  |  |  |
|                                                           |                                                                                                                                                                                |                                                                                                                                                                                                                                            |                                                                                     |  |  |  |  |  |                                                                                                                                                                                                                                                                                                  |  |  |  |  |  |  |
|                                                           |                                                                                                                                                                                |                                                                                                                                                                                                                                            |                                                                                     |  |  |  |  |  |                                                                                                                                                                                                                                                                                                  |  |  |  |  |  |  |
|                                                           |                                                                                                                                                                                |                                                                                                                                                                                                                                            |                                                                                     |  |  |  |  |  |                                                                                                                                                                                                                                                                                                  |  |  |  |  |  |  |
| <b>Time frame: past 36 months</b>                         |                                                                                                                                                                                |                                                                                                                                                                                                                                            |                                                                                     |  |  |  |  |  |                                                                                                                                                                                                                                                                                                  |  |  |  |  |  |  |
| <b>2</b>                                                  | Grants or contracts from any entity (if not indicated in item #1 above).                                                                                                       | <input checked="" type="checkbox"/> <b>None</b><br><table border="1" style="width: 100%; height: 40px; margin-top: 5px;"> <tr><td style="width: 60%;"></td><td></td></tr> <tr><td></td><td></td></tr> <tr><td></td><td></td></tr> </table> |                                                                                     |  |  |  |  |  | <table border="1" style="width: 100%; height: 40px; margin-top: 5px;"> <tr><td style="width: 60%;"></td><td></td></tr> <tr><td></td><td></td></tr> <tr><td></td><td></td></tr> </table>                                                                                                          |  |  |  |  |  |  |
|                                                           |                                                                                                                                                                                |                                                                                                                                                                                                                                            |                                                                                     |  |  |  |  |  |                                                                                                                                                                                                                                                                                                  |  |  |  |  |  |  |
|                                                           |                                                                                                                                                                                |                                                                                                                                                                                                                                            |                                                                                     |  |  |  |  |  |                                                                                                                                                                                                                                                                                                  |  |  |  |  |  |  |
|                                                           |                                                                                                                                                                                |                                                                                                                                                                                                                                            |                                                                                     |  |  |  |  |  |                                                                                                                                                                                                                                                                                                  |  |  |  |  |  |  |
|                                                           |                                                                                                                                                                                |                                                                                                                                                                                                                                            |                                                                                     |  |  |  |  |  |                                                                                                                                                                                                                                                                                                  |  |  |  |  |  |  |
|                                                           |                                                                                                                                                                                |                                                                                                                                                                                                                                            |                                                                                     |  |  |  |  |  |                                                                                                                                                                                                                                                                                                  |  |  |  |  |  |  |
|                                                           |                                                                                                                                                                                |                                                                                                                                                                                                                                            |                                                                                     |  |  |  |  |  |                                                                                                                                                                                                                                                                                                  |  |  |  |  |  |  |
| <b>3</b>                                                  | Royalties or licenses                                                                                                                                                          | <input checked="" type="checkbox"/> <b>None</b><br><table border="1" style="width: 100%; height: 40px; margin-top: 5px;"> <tr><td style="width: 60%;"></td><td></td></tr> <tr><td></td><td></td></tr> <tr><td></td><td></td></tr> </table> |                                                                                     |  |  |  |  |  | <table border="1" style="width: 100%; height: 40px; margin-top: 5px;"> <tr><td style="width: 60%;"></td><td></td></tr> <tr><td></td><td></td></tr> <tr><td></td><td></td></tr> </table>                                                                                                          |  |  |  |  |  |  |
|                                                           |                                                                                                                                                                                |                                                                                                                                                                                                                                            |                                                                                     |  |  |  |  |  |                                                                                                                                                                                                                                                                                                  |  |  |  |  |  |  |
|                                                           |                                                                                                                                                                                |                                                                                                                                                                                                                                            |                                                                                     |  |  |  |  |  |                                                                                                                                                                                                                                                                                                  |  |  |  |  |  |  |
|                                                           |                                                                                                                                                                                |                                                                                                                                                                                                                                            |                                                                                     |  |  |  |  |  |                                                                                                                                                                                                                                                                                                  |  |  |  |  |  |  |
|                                                           |                                                                                                                                                                                |                                                                                                                                                                                                                                            |                                                                                     |  |  |  |  |  |                                                                                                                                                                                                                                                                                                  |  |  |  |  |  |  |
|                                                           |                                                                                                                                                                                |                                                                                                                                                                                                                                            |                                                                                     |  |  |  |  |  |                                                                                                                                                                                                                                                                                                  |  |  |  |  |  |  |
|                                                           |                                                                                                                                                                                |                                                                                                                                                                                                                                            |                                                                                     |  |  |  |  |  |                                                                                                                                                                                                                                                                                                  |  |  |  |  |  |  |

|    |                                                                                                              | Name all entities with whom you have this relationship or indicate none (add rows as needed)                                                                                                                                                                                                                                                                           | Specifications/Comments (e.g., if payments were made to you or to your institution) |  |  |  |  |  |  |  |  |
|----|--------------------------------------------------------------------------------------------------------------|------------------------------------------------------------------------------------------------------------------------------------------------------------------------------------------------------------------------------------------------------------------------------------------------------------------------------------------------------------------------|-------------------------------------------------------------------------------------|--|--|--|--|--|--|--|--|
| 4  | Consulting fees                                                                                              | <input checked="" type="checkbox"/> <b>None</b><br><table border="1" style="width: 100%; border-collapse: collapse;"> <tr><td style="width: 50%; height: 15px;"></td><td style="width: 50%;"></td></tr> <tr><td style="height: 15px;"></td><td></td></tr> <tr><td style="height: 15px;"></td><td></td></tr> <tr><td style="height: 15px;"></td><td></td></tr> </table> |                                                                                     |  |  |  |  |  |  |  |  |
|    |                                                                                                              |                                                                                                                                                                                                                                                                                                                                                                        |                                                                                     |  |  |  |  |  |  |  |  |
|    |                                                                                                              |                                                                                                                                                                                                                                                                                                                                                                        |                                                                                     |  |  |  |  |  |  |  |  |
|    |                                                                                                              |                                                                                                                                                                                                                                                                                                                                                                        |                                                                                     |  |  |  |  |  |  |  |  |
|    |                                                                                                              |                                                                                                                                                                                                                                                                                                                                                                        |                                                                                     |  |  |  |  |  |  |  |  |
| 5  | Payment or honoraria for lectures, presentations, speakers bureaus, manuscript writing or educational events | <input checked="" type="checkbox"/> <b>None</b><br><table border="1" style="width: 100%; border-collapse: collapse;"> <tr><td style="width: 50%; height: 15px;"></td><td style="width: 50%;"></td></tr> <tr><td style="height: 15px;"></td><td></td></tr> <tr><td style="height: 15px;"></td><td></td></tr> </table>                                                   |                                                                                     |  |  |  |  |  |  |  |  |
|    |                                                                                                              |                                                                                                                                                                                                                                                                                                                                                                        |                                                                                     |  |  |  |  |  |  |  |  |
|    |                                                                                                              |                                                                                                                                                                                                                                                                                                                                                                        |                                                                                     |  |  |  |  |  |  |  |  |
|    |                                                                                                              |                                                                                                                                                                                                                                                                                                                                                                        |                                                                                     |  |  |  |  |  |  |  |  |
| 6  | Payment for expert testimony                                                                                 | <input checked="" type="checkbox"/> <b>None</b><br><table border="1" style="width: 100%; border-collapse: collapse;"> <tr><td style="width: 50%; height: 15px;"></td><td style="width: 50%;"></td></tr> <tr><td style="height: 15px;"></td><td></td></tr> <tr><td style="height: 15px;"></td><td></td></tr> </table>                                                   |                                                                                     |  |  |  |  |  |  |  |  |
|    |                                                                                                              |                                                                                                                                                                                                                                                                                                                                                                        |                                                                                     |  |  |  |  |  |  |  |  |
|    |                                                                                                              |                                                                                                                                                                                                                                                                                                                                                                        |                                                                                     |  |  |  |  |  |  |  |  |
|    |                                                                                                              |                                                                                                                                                                                                                                                                                                                                                                        |                                                                                     |  |  |  |  |  |  |  |  |
| 7  | Support for attending meetings and/or travel                                                                 | <input checked="" type="checkbox"/> <b>None</b><br><table border="1" style="width: 100%; border-collapse: collapse;"> <tr><td style="width: 50%; height: 15px;"></td><td style="width: 50%;"></td></tr> <tr><td style="height: 15px;"></td><td></td></tr> <tr><td style="height: 15px;"></td><td></td></tr> </table>                                                   |                                                                                     |  |  |  |  |  |  |  |  |
|    |                                                                                                              |                                                                                                                                                                                                                                                                                                                                                                        |                                                                                     |  |  |  |  |  |  |  |  |
|    |                                                                                                              |                                                                                                                                                                                                                                                                                                                                                                        |                                                                                     |  |  |  |  |  |  |  |  |
|    |                                                                                                              |                                                                                                                                                                                                                                                                                                                                                                        |                                                                                     |  |  |  |  |  |  |  |  |
| 8  | Patents planned, issued or pending                                                                           | <input checked="" type="checkbox"/> <b>None</b><br><table border="1" style="width: 100%; border-collapse: collapse;"> <tr><td style="width: 50%; height: 15px;"></td><td style="width: 50%;"></td></tr> <tr><td style="height: 15px;"></td><td></td></tr> <tr><td style="height: 15px;"></td><td></td></tr> </table>                                                   |                                                                                     |  |  |  |  |  |  |  |  |
|    |                                                                                                              |                                                                                                                                                                                                                                                                                                                                                                        |                                                                                     |  |  |  |  |  |  |  |  |
|    |                                                                                                              |                                                                                                                                                                                                                                                                                                                                                                        |                                                                                     |  |  |  |  |  |  |  |  |
|    |                                                                                                              |                                                                                                                                                                                                                                                                                                                                                                        |                                                                                     |  |  |  |  |  |  |  |  |
| 9  | Participation on a Data Safety Monitoring Board or Advisory Board                                            | <input checked="" type="checkbox"/> <b>None</b><br><table border="1" style="width: 100%; border-collapse: collapse;"> <tr><td style="width: 50%; height: 15px;"></td><td style="width: 50%;"></td></tr> <tr><td style="height: 15px;"></td><td></td></tr> <tr><td style="height: 15px;"></td><td></td></tr> </table>                                                   |                                                                                     |  |  |  |  |  |  |  |  |
|    |                                                                                                              |                                                                                                                                                                                                                                                                                                                                                                        |                                                                                     |  |  |  |  |  |  |  |  |
|    |                                                                                                              |                                                                                                                                                                                                                                                                                                                                                                        |                                                                                     |  |  |  |  |  |  |  |  |
|    |                                                                                                              |                                                                                                                                                                                                                                                                                                                                                                        |                                                                                     |  |  |  |  |  |  |  |  |
| 10 | Leadership or fiduciary role in other board, society, committee or advocacy group, paid or unpaid            | <input checked="" type="checkbox"/> <b>None</b><br><table border="1" style="width: 100%; border-collapse: collapse;"> <tr><td style="width: 50%; height: 15px;"></td><td style="width: 50%;"></td></tr> <tr><td style="height: 15px;"></td><td></td></tr> <tr><td style="height: 15px;"></td><td></td></tr> </table>                                                   |                                                                                     |  |  |  |  |  |  |  |  |
|    |                                                                                                              |                                                                                                                                                                                                                                                                                                                                                                        |                                                                                     |  |  |  |  |  |  |  |  |
|    |                                                                                                              |                                                                                                                                                                                                                                                                                                                                                                        |                                                                                     |  |  |  |  |  |  |  |  |
|    |                                                                                                              |                                                                                                                                                                                                                                                                                                                                                                        |                                                                                     |  |  |  |  |  |  |  |  |

|           |                                                                                  | Name all entities with whom you have this relationship or indicate none (add rows as needed)                                                                                                                                                                                                                         | Specifications/Comments (e.g., if payments were made to you or to your institution) |  |  |  |  |  |  |
|-----------|----------------------------------------------------------------------------------|----------------------------------------------------------------------------------------------------------------------------------------------------------------------------------------------------------------------------------------------------------------------------------------------------------------------|-------------------------------------------------------------------------------------|--|--|--|--|--|--|
| <b>11</b> | Stock or stock options                                                           | <input checked="" type="checkbox"/> <b>None</b><br><table border="1" style="width: 100%; border-collapse: collapse;"> <tr><td style="width: 50%; height: 15px;"></td><td style="width: 50%;"></td></tr> <tr><td style="height: 15px;"></td><td></td></tr> <tr><td style="height: 15px;"></td><td></td></tr> </table> |                                                                                     |  |  |  |  |  |  |
|           |                                                                                  |                                                                                                                                                                                                                                                                                                                      |                                                                                     |  |  |  |  |  |  |
|           |                                                                                  |                                                                                                                                                                                                                                                                                                                      |                                                                                     |  |  |  |  |  |  |
|           |                                                                                  |                                                                                                                                                                                                                                                                                                                      |                                                                                     |  |  |  |  |  |  |
| <b>12</b> | Receipt of equipment, materials, drugs, medical writing, gifts or other services | <input checked="" type="checkbox"/> <b>None</b><br><table border="1" style="width: 100%; border-collapse: collapse;"> <tr><td style="width: 50%; height: 15px;"></td><td style="width: 50%;"></td></tr> <tr><td style="height: 15px;"></td><td></td></tr> <tr><td style="height: 15px;"></td><td></td></tr> </table> |                                                                                     |  |  |  |  |  |  |
|           |                                                                                  |                                                                                                                                                                                                                                                                                                                      |                                                                                     |  |  |  |  |  |  |
|           |                                                                                  |                                                                                                                                                                                                                                                                                                                      |                                                                                     |  |  |  |  |  |  |
|           |                                                                                  |                                                                                                                                                                                                                                                                                                                      |                                                                                     |  |  |  |  |  |  |
| <b>13</b> | Other financial or non-financial interests                                       | <input checked="" type="checkbox"/> <b>None</b><br><table border="1" style="width: 100%; border-collapse: collapse;"> <tr><td style="width: 50%; height: 15px;"></td><td style="width: 50%;"></td></tr> <tr><td style="height: 15px;"></td><td></td></tr> <tr><td style="height: 15px;"></td><td></td></tr> </table> |                                                                                     |  |  |  |  |  |  |
|           |                                                                                  |                                                                                                                                                                                                                                                                                                                      |                                                                                     |  |  |  |  |  |  |
|           |                                                                                  |                                                                                                                                                                                                                                                                                                                      |                                                                                     |  |  |  |  |  |  |
|           |                                                                                  |                                                                                                                                                                                                                                                                                                                      |                                                                                     |  |  |  |  |  |  |

**Please place an "X" next to the following statement to indicate your agreement:**

I certify that I have answered every question and have not altered the wording of any of the questions on this form.
